# Supplementary material for: The impact of PPARα activation on whole genome gene expression in human precision cut liver slices
Source: PubMed Central journal article supplement (PMC4599789; doi:10.1186/s12864-015-1969-3), 2015-10-08
Supplement: 12864_2015_1969_MOESM1_ESM.pdf [file 12864_2015_1969_MOESM1_ESM.pdf]

| Entrez ID | gene name | fold change | q-value  | description                                                                                 |
|-----------|-----------|-------------|----------|---------------------------------------------------------------------------------------------|
| 7436      | VLDLR     | 4.11        | 4.38E-07 | very low density lipoprotein receptor                                                       |
| 57016     | AKR1B10   | 3.09        | 6.09E-05 | aldo-keto reductase family 1, member B10 (aldose reductase)                                 |
| 1576      | CYP3A4    | 3.07        | 5.23E-07 | cytochrome P450, family 3, subfamily A, polypeptide 4                                       |
| 3992      | FADS1     | 3.06        | 1.02E-06 | fatty acid desaturase 1                                                                     |
| 123       | PLIN2     | 2.91        | 2.46E-06 | perilipin 2                                                                                 |
| 25987     | TSKU      | 2.90        | 1.98E-06 | tsukushi, small leucine rich proteoglycan                                                   |
| 5447      | POR       | 2.90        | 1.22E-07 | P450 (cytochrome) oxidoreductase                                                            |
| 1551      | CYP3A7    | 2.85        | 2.50E-02 | cytochrome P450, family 3, subfamily A, polypeptide 7                                       |
| 51129     | ANGPTL4   | 2.82        | 1.22E-07 | angiotensin-like 4                                                                          |
| 1556      | CYP2B7P   | 2.64        | 6.79E-04 | cytochrome P450, family 2, subfamily B, polypeptide 7, pseudogene                           |
| 54509     | RHOF      | 2.52        | 4.50E-06 | ras homolog family member F (in filopodia)                                                  |
| 5020      | OXT       | 2.52        | 9.73E-06 | oxytocin/neurophysin 1 prepropeptide                                                        |
| 147645    | VSIG10L   | 2.40        | 2.84E-06 | V-set and immunoglobulin domain containing 10 like                                          |
| 9415      | FADS2     | 2.37        | 2.15E-05 | fatty acid desaturase 2                                                                     |
| 6581      | SLC22A3   | 2.26        | 8.61E-07 | solute carrier family 22 (organic cation transporter), member 3                             |
| 10149     | GPR64     | 2.23        | 4.02E-05 | G protein-coupled receptor 64                                                               |
| 1244      | ABCC2     | 2.23        | 2.41E-07 | ATP-binding cassette, sub-family C (CFTR/MRP), member 2                                     |
| 771       | CA12      | 2.18        | 3.21E-05 | carbonic anhydrase XII                                                                      |
| 1374      | CPT1A     | 2.12        | 3.97E-07 | carnitine palmitoyltransferase 1A (liver)                                                   |
| 493861    | EID3      | 2.10        | 2.73E-07 | EP300 interacting inhibitor of differentiation 3                                            |
| 1577      | CYP3A5    | 2.09        | 5.97E-07 | cytochrome P450, family 3, subfamily A, polypeptide 5                                       |
| 84803     | AGPAT9    | 2.05        | 6.46E-07 | 1-acylglycerol-3-phosphate O-acyltransferase 9                                              |
| 1555      | CYP2B6    | 2.04        | 4.78E-05 | cytochrome P450, family 2, subfamily B, polypeptide 6                                       |
| 5166      | PDK4      | 2.01        | 1.28E-04 | pyruvate dehydrogenase kinase, isozyme 4                                                    |
| 55103     | RALGPS2   | 1.99        | 6.09E-05 | Ral GEF with PH domain and SH3 binding motif 2                                              |
| 929       | CD14      | 1.95        | 8.61E-07 | CD14 molecule                                                                               |
| 140809    | SRXN1     | 1.95        | 3.46E-06 | sulfiredoxin 1                                                                              |
| 344887    | LOC344887 | 1.90        | 4.01E-03 | NmrA-like family domain containing 1 pseudogene                                             |
| 1545      | CYP1B1    | 1.87        | 7.74E-05 | cytochrome P450, family 1, subfamily B, polypeptide 1                                       |
| 2168      | FABP1     | 1.87        | 7.58E-06 | fatty acid binding protein 1, liver                                                         |
| 57089     | ENTPD7    | 1.87        | 6.46E-07 | ectonucleoside triphosphate diphosphohydrolase 7                                            |
| 2810      | SFN       | 1.86        | 4.82E-05 | stratifin                                                                                   |
| 10999     | SLC27A4   | 1.82        | 4.50E-06 | solute carrier family 27 (fatty acid transporter), member 4                                 |
| 4153      | MBL2      | 1.80        | 3.76E-03 | mannose-binding lectin (protein C) 2, soluble                                               |
| 211       | ALAS1     | 1.78        | 6.88E-06 | aminolevulinic acid, delta-, synthase 1                                                     |
| 135656    | DPCR1     | 1.77        | 4.24E-02 | diffuse panbronchiolitis critical region 1                                                  |
| 9518      | GDF15     | 1.77        | 7.30E-05 | growth differentiation factor 15                                                            |
| 79071     | ELOVL6    | 1.77        | 1.94E-03 | ELOVL fatty acid elongase 6                                                                 |
| 1955      | MEGF9     | 1.76        | 6.13E-05 | multiple EGF-like-domains 9                                                                 |
| 84675     | TRIM55    | 1.75        | 1.78E-03 | tripartite motif containing 55                                                              |
| 51703     | ACSL5     | 1.75        | 4.38E-07 | acyl-CoA synthetase long-chain family member 5                                              |
| 2729      | GCLC      | 1.75        | 7.08E-06 | glutamate-cysteine ligase, catalytic subunit                                                |
| 28449     | IGHV3-13  | 1.75        | 2.94E-02 | immunoglobulin heavy variable 3-13                                                          |
| 54210     | TREM1     | 1.73        | 3.69E-04 | triggering receptor expressed on myeloid cells 1                                            |
| 2151      | F2RL2     | 1.73        | 3.11E-02 | coagulation factor II (thrombin) receptor-like 2                                            |
| 10786     | SLC17A3   | 1.73        | 9.39E-03 | solute carrier family 17 (organic anion transporter), member 3                              |
| 6974      | TRGV2     | 1.72        | 4.52E-02 | T cell receptor gamma variable 2                                                            |
| 7296      | TXNRD1    | 1.72        | 6.36E-07 | thioredoxin reductase 1                                                                     |
| 4835      | NQO2      | 1.72        | 5.65E-06 | NAD(P)H dehydrogenase, quinone 2                                                            |
| 37        | ACADVL    | 1.72        | 1.06E-06 | acyl-CoA dehydrogenase, very long chain                                                     |
| 23657     | SLC7A11   | 1.71        | 1.25E-03 | solute carrier family 7 (anionic amino acid transporter light chain, xc- system), member 11 |
| 552       | AVPR1A    | 1.71        | 1.56E-03 | arginine vasopressin receptor 1A                                                            |
| 3131      | HLF       | 1.70        | 6.58E-03 | hepatic leukemia factor                                                                     |
| 11069     | RAPGEF4   | 1.70        | 1.78E-03 | Rap guanine nucleotide exchange factor (GEF) 4                                              |
| 10058     | ABC86     | 1.70        | 6.09E-05 | ATP-binding cassette, sub-family B (MDR/TAP), member 6                                      |
| 1591      | CYP24A1   | 1.66        | 3.37E-02 | cytochrome P450, family 24, subfamily A, polypeptide 1                                      |
| 2184      | FAH       | 1.66        | 2.46E-06 | fumarylacetoacetate hydrolase (fumarylacetoacetase)                                         |
| 13        | AADAC     | 1.65        | 1.04E-04 | arylacetamide deacetylase                                                                   |
| 8431      | NROB2     | 1.65        | 1.18E-02 | nuclear receptor subfamily 0, group B, member 2                                             |
| 3148      | HMGB2     | 1.65        | 1.24E-03 | high mobility group box 2                                                                   |
| 89866     | SEC16B    | 1.64        | 2.22E-03 | SEC16 homolog B (S. cerevisiae)                                                             |
| 7363      | UGT2B4    | 1.64        | 7.62E-06 | UDP glucuronosyltransferase 2 family, polypeptide B4                                        |
| 23189     | KANK1     | 1.64        | 1.40E-05 | KN motif and ankyrin repeat domains 1                                                       |
| 990       | CDC6      | 1.64        | 2.47E-02 | cell division cycle 6                                                                       |
| 2730      | GCLM      | 1.63        | 1.44E-05 | glutamate-cysteine ligase, modifier subunit                                                 |
| 54346     | UNC93A    | 1.63        | 1.38E-03 | unc-93 homolog A (C. elegans)                                                               |
| 57761     | TRIB3     | 1.62        | 5.48E-04 | tribbles pseudokinase 3                                                                     |
| 7378      | UPP1      | 1.62        | 1.47E-03 | uridine phosphorylase 1                                                                     |
| 168620    | BHLHA15   | 1.61        | 1.30E-03 | basic helix-loop-helix family, member a15                                                   |
| 1528      | CYB5A     | 1.61        | 3.69E-04 | cytochrome b5 type A (microsomal)                                                           |
| 2167      | FABP4     | 1.61        | 4.10E-02 | fatty acid binding protein 4, adipocyte                                                     |
| 1559      | CYP2C9    | 1.61        | 1.76E-04 | cytochrome P450, family 2, subfamily C, polypeptide 9                                       |
| 4862      | NPAS2     | 1.60        | 5.28E-03 | neuronal PAS domain protein 2                                                               |
| 6584      | SLC22A5   | 1.60        | 3.82E-03 | solute carrier family 22 (organic cation/carnitine transporter), member 5                   |
| 2181      | ACSL3     | 1.60        | 5.26E-05 | acyl-CoA synthetase long-chain family member 3                                              |
| 54518     | APBB1IP   | 1.60        | 6.47E-04 | amyloid beta (A4) precursor protein-binding, family B, member 1 interacting protein         |
| 1891      | ECH1      | 1.59        | 5.33E-05 | enoyl CoA hydratase 1, peroxisomal                                                          |
| 65084     | TMEM135   | 1.59        | 9.41E-04 | transmembrane protein 135                                                                   |
| 1645      | AKR1C1    | 1.58        | 6.09E-05 | aldo-keto reductase family 1, member C1                                                     |
| 11153     | FICD      | 1.58        | 2.38E-04 | FIC domain containing                                                                       |
| 11200     | CHEK2     | 1.58        | 4.83E-02 | checkpoint kinase 2                                                                         |
| 54551     | MAGEL2    | 1.58        | 3.94E-02 | MAGE-like 2                                                                                 |
| 2852      | GPER1     | 1.57        | 4.80E-03 | G protein-coupled estrogen receptor 1                                                       |
| 79729     | SH3D21    | 1.57        | 7.73E-04 | SH3 domain containing 21                                                                    |
| 164832    | LONRF2    | 1.57        | 1.39E-02 | LON peptidase N-terminal domain and ring finger 2                                           |
| 8644      | AKR1C3    | 1.57        | 3.76E-03 | aldo-keto reductase family 1, member C3                                                     |
| 8462      | KLF11     | 1.57        | 1.86E-04 | Kruppel-like factor 11                                                                      |
| 4882      | NPR2      | 1.56        | 3.72E-03 | natriuretic peptide receptor 2                                                              |
| 84263     | HSDL2     | 1.55        | 2.41E-05 | hydroxysteroid dehydrogenase like 2                                                         |
| 50999     | TMED5     | 1.55        | 1.02E-06 | transmembrane emp24 protein transport domain containing 5                                   |
| 873       | CBR1      | 1.54        | 1.04E-04 | carbonyl reductase 1                                                                        |
| 6319      | SCD       | 1.54        | 1.17E-03 | stearoyl-CoA desaturase (delta-9-desaturase)                                                |
| 55532     | SLC30A10  | 1.54        | 8.22E-05 | solute carrier family 30, member 10                                                         |
| 1271      | CNTFR     | 1.53        | 5.22E-03 | ciliary neurotrophic factor receptor                                                        |
| 51076     | CUTC      | 1.53        | 4.39E-04 | cutC copper transporter                                                                     |
| 133746    | JMY       | 1.53        | 9.05E-03 | junction mediating and regulatory protein, p53 cofactor                                     |
| 3024      | HIST1H1A  | 1.53        | 5.74E-03 | histone cluster 1, H1a                                                                      |
| 193629    | LINC00189 | 1.52        | 9.60E-03 | long intergenic non-protein coding RNA 189                                                  |
| 84883     | AIFM2     | 1.52        | 1.30E-04 | apoptosis-inducing factor, mitochondrion-associated, 2                                      |
| 64061     | TSPYL2    | 1.52        | 1.55E-03 | TSPY-like 2                                                                                 |

|           |             |      |          |                                                                                                         |
|-----------|-------------|------|----------|---------------------------------------------------------------------------------------------------------|
| 5226      | PGD         | 1.51 | 9.62E-06 | phosphogluconate dehydrogenase                                                                          |
| 7466      | WFS1        | 1.51 | 1.59E-03 | Wolfram syndrome 1 (wolframin)                                                                          |
| 3613      | IMPA2       | 1.51 | 1.47E-02 | inositol(myo)-1(or 4)-monophosphatase 2                                                                 |
| 91614     | DEPDC7      | 1.50 | 3.03E-03 | DEP domain containing 7                                                                                 |
| 275       | AMT         | 1.50 | 1.20E-03 | aminomethyltransferase                                                                                  |
| 5652      | PRSS8       | 1.50 | 9.97E-03 | protease, serine, 8                                                                                     |
| 1647      | GADD45A     | 1.50 | 1.00E-02 | growth arrest and DNA-damage-inducible, alpha                                                           |
| 4189      | DNAJB9      | 1.50 | 4.13E-04 | DnaJ (Hsp40) homolog, subfamily B, member 9                                                             |
| 79631     | EFTUD1      | 1.49 | 1.39E-02 | elongation factor Tu GTP binding domain containing 1                                                    |
| 65124     | SOWAHC      | 1.49 | 1.28E-03 | sonosdown ankryrin repeat domain family member C                                                        |
| 161436    | EML5        | 1.49 | 1.55E-02 | echinoderm microtubule associated protein like 5                                                        |
| 3309      | HSPA5       | 1.49 | 2.20E-05 | heat shock 70kDa protein 5 (glucose-regulated protein, 78kDa)                                           |
| 51083     | GAL         | 1.49 | 2.56E-02 | galanin/GMAP prepropeptide                                                                              |
| 1376      | CPT2        | 1.49 | 7.56E-03 | carnitine palmitoyltransferase 2                                                                        |
| 10110     | SGK2        | 1.48 | 3.63E-02 | serum/glucocorticoid regulated kinase 2                                                                 |
| 26291     | FGF21       | 1.48 | 3.54E-02 | fibroblast growth factor 21                                                                             |
| 1558      | CYP2C8      | 1.48 | 6.39E-05 | cytochrome P450, family 2, subfamily C, polypeptide 8                                                   |
| 2936      | GSR         | 1.47 | 5.65E-06 | glutathione reductase                                                                                   |
| 10166     | SLC25A15    | 1.47 | 5.23E-03 | solute carrier family 25 (mitochondrial carrier // ornithine transporter) member 15                     |
| 83667     | SESN2       | 1.47 | 4.17E-03 | sestrin 2                                                                                               |
| 83699     | SH3BGRL2    | 1.47 | 3.83E-03 | SH3 domain binding glutamate-rich protein like 2                                                        |
| 734       | OSGIN2      | 1.47 | 8.41E-04 | oxidative stress induced growth inhibitor family member 2                                               |
| 132299    | OClAD2      | 1.47 | 1.48E-04 | OClA domain containing 2                                                                                |
| 114038    | LINC00313   | 1.46 | 6.80E-03 | long intergenic non-protein coding RNA 313                                                              |
| 54825     | CDHR2       | 1.45 | 1.27E-03 | cadherin-related family member 2                                                                        |
| 444       | ASPH        | 1.45 | 1.04E-04 | aspartate beta-hydroxylase                                                                              |
| 3242      | HPD         | 1.45 | 7.99E-06 | 4-hydroxyphenylpyruvate dioxygenase                                                                     |
| 51117     | COQ4        | 1.45 | 6.58E-03 | coenzyme Q4                                                                                             |
| 144423    | GLT1D1      | 1.45 | 1.31E-03 | glycosyltransferase 1 domain containing 1                                                               |
| 6505      | SLC1A1      | 1.45 | 3.87E-03 | solute carrier family 1 (neuronal/epithelial high affinity glutamate transporter, system Xag), member 1 |
| 84243     | ZDHHC18     | 1.45 | 7.30E-05 | zinc finger, DHHC-type containing 18                                                                    |
| 9540      | TP53I3      | 1.44 | 9.80E-03 | tumor protein p53 inducible protein 3                                                                   |
| 8517      | IKBKG       | 1.44 | 3.37E-03 | inhibitor of kappa light polypeptide gene enhancer in B-cells, kinase gamma                             |
| 8800      | PEX11A      | 1.44 | 8.67E-03 | peroxisomal biogenesis factor 11 alpha                                                                  |
| 201161    | CENPV       | 1.44 | 1.23E-02 | centromere protein V                                                                                    |
| 389432    | SAMD5       | 1.44 | 2.20E-03 | sterile alpha motif domain containing 5                                                                 |
| 54884     | RETSAT      | 1.43 | 3.62E-03 | retinol saturase (all-trans-retinol 13,14-reductase)                                                    |
| 730102    | LOC730102   | 1.43 | 2.76E-02 | quinone oxidoreductase-like protein 2 pseudogene                                                        |
| 1548      | CYP2A6      | 1.43 | 3.35E-04 | cytochrome P450, family 2, subfamily A, polypeptide 6                                                   |
| 2632      | GBE1        | 1.43 | 9.92E-05 | glucan (1,4-alpha-), branching enzyme 1                                                                 |
| 127845    | GOLT1A      | 1.43 | 7.42E-03 | golgi transport 1A                                                                                      |
| 22949     | PTGR1       | 1.43 | 1.36E-04 | prostaglandin reductase 1                                                                               |
| 9709      | HERPUD1     | 1.42 | 9.37E-03 | homocysteine-inducible, endoplasmic reticulum stress-inducible, ubiquitin-like domain member 1          |
| 5238      | PGM3        | 1.42 | 7.30E-05 | phosphoglucomutase 3                                                                                    |
| 114883    | OSBPL9      | 1.42 | 5.01E-06 | oxysterol binding protein-like 9                                                                        |
| 7498      | XDH         | 1.42 | 1.13E-02 | xanthine dehydrogenase                                                                                  |
| 8501      | SLC43A1     | 1.42 | 1.98E-03 | solute carrier family 43 (amino acid system L transporter), member 1                                    |
| 54978     | SLC35F6     | 1.42 | 2.47E-03 | solute carrier family 35, member F6                                                                     |
| 51302     | CYP39A1     | 1.42 | 1.21E-02 | cytochrome P450, family 39, subfamily A, polypeptide 1                                                  |
| 133686    | NADK2       | 1.42 | 4.50E-04 | NAD kinase 2, mitochondrial                                                                             |
| 25998     | IBTK        | 1.41 | 2.35E-05 | inhibitor of Bruton agammaglobulinemia tyrosine kinase                                                  |
| 4337      | MOCS1       | 1.41 | 6.77E-03 | molybdenum cofactor synthesis 1                                                                         |
| 3690      | ITGB3       | 1.41 | 5.11E-04 | integrin, beta 3 (platelet glycoprotein IIIa, antigen CD61)                                             |
| 55323     | LARP6       | 1.41 | 2.16E-03 | La ribonucleoprotein domain family, member 6                                                            |
| 79605     | PGBD5       | 1.41 | 2.11E-02 | piggYBac transposable element derived 5                                                                 |
| 65009     | NDRG4       | 1.41 | 3.79E-02 | NDRG family member 4                                                                                    |
| 152189    | CMTM8       | 1.40 | 1.97E-03 | CKLF-like MARVEL transmembrane domain containing 8                                                      |
| 30061     | SLC40A1     | 1.40 | 3.68E-02 | solute carrier family 40 (iron-regulated transporter), member 1                                         |
| 79922     | MRM1        | 1.40 | 4.56E-02 | mitochondrial rRNA methyltransferase 1 homolog (S. cerevisiae)                                          |
| 51559     | NT5DC3      | 1.40 | 2.51E-02 | 5'-nucleotidase domain containing 3                                                                     |
| 54893     | MTMR10      | 1.40 | 6.83E-04 | myotubularin related protein 10                                                                         |
| 343099    | CCDC18      | 1.40 | 6.00E-03 | coiled-coil domain containing 18                                                                        |
| 51533     | PHF7        | 1.40 | 6.39E-03 | PHD finger protein 7                                                                                    |
| 10162     | LPCAT3      | 1.40 | 1.45E-02 | lysophosphatidylcholine acyltransferase 3                                                               |
| 6888      | TALDO1      | 1.39 | 4.50E-06 | transaldolase 1                                                                                         |
| 2110      | ETFHD       | 1.39 | 8.52E-04 | electron-transferring-flavoprotein dehydrogenase                                                        |
| 997       | CDC34       | 1.39 | 3.37E-03 | cell division cycle 34                                                                                  |
| 10486     | CAP2        | 1.39 | 3.43E-03 | CAP, adenylate cyclase-associated protein, 2 (yeast)                                                    |
| 23327     | NEDD4L      | 1.39 | 1.30E-03 | neural precursor cell expressed, developmentally down-regulated 4-like, E3 ubiquitin protein ligase     |
| 847       | CAT         | 1.39 | 1.91E-04 | catalase                                                                                                |
| 89894     | TMEM116     | 1.39 | 1.75E-02 | transmembrane protein 116                                                                               |
| 345757    | FAM174A     | 1.39 | 1.00E-02 | family with sequence similarity 174, member A                                                           |
| 220108    | FAM124A     | 1.39 | 3.84E-02 | family with sequence similarity 124A                                                                    |
| 124512    | METTL23     | 1.39 | 1.38E-02 | methyltransferase like 23                                                                               |
| 4925      | NUCB2       | 1.39 | 8.11E-03 | nucleobindin 2                                                                                          |
| 10113     | PREB        | 1.38 | 1.25E-02 | prolactin regulatory element binding                                                                    |
| 57406     | ABHD6       | 1.38 | 1.32E-02 | abhydrolase domain containing 6                                                                         |
| 51567     | TDP2        | 1.38 | 2.79E-04 | tyrosyl-DNA phosphodiesterase 2                                                                         |
| 84719     | LINC00260   | 1.38 | 2.72E-02 | long intergenic non-protein coding RNA 260                                                              |
| 56605     | ERO1LB      | 1.38 | 1.76E-03 | ERO1-like beta (S. cerevisiae)                                                                          |
| 64093     | SMOC1       | 1.38 | 1.04E-02 | SPARC related modular calcium binding 1                                                                 |
| 63874     | ABHD4       | 1.38 | 4.43E-04 | abhydrolase domain containing 4                                                                         |
| 1646      | AKR1C2      | 1.38 | 2.78E-04 | aldo-keto reductase family 1, member C2                                                                 |
| 100272147 | CMC4        | 1.38 | 1.15E-02 | C-x(9)-C motif containing 4                                                                             |
| 2108      | ETFA        | 1.38 | 1.38E-04 | electron-transfer-flavoprotein, alpha polypeptide                                                       |
| 3708      | ITPR1       | 1.38 | 8.27E-04 | inositol 1,4,5-trisphosphate receptor, type 1                                                           |
| 11001     | SLC27A2     | 1.38 | 1.29E-03 | solute carrier family 27 (fatty acid transporter), member 2                                             |
| 57149     | LYRM1       | 1.38 | 2.82E-03 | LYR motif containing 1                                                                                  |
| 2673      | GFPT1       | 1.38 | 2.35E-03 | glutamine-fructose-6-phosphate transaminase 1                                                           |
| 112849    | L3HYPDH     | 1.38 | 2.11E-02 | L-3-hydroxyproline dehydratase (trans-)                                                                 |
| 9601      | PDI4        | 1.38 | 1.20E-03 | protein disulfide isomerase family A, member 4                                                          |
| 100033432 | SNORD116-21 | 1.37 | 3.54E-02 | small nucleolar RNA, C/D box 116-21                                                                     |
| 10449     | ACAA2       | 1.37 | 7.03E-04 | acetyl-CoA acyltransferase 2                                                                            |
| 8856      | NR1I2       | 1.37 | 1.17E-02 | nuclear receptor subfamily 1, group I, member 2                                                         |
| 10891     | PPARGC1A    | 1.37 | 3.61E-03 | peroxisome proliferator-activated receptor gamma, coactivator 1 alpha                                   |
| 257364    | SNX33       | 1.37 | 1.03E-02 | sorting nexin 33                                                                                        |
| 29948     | OSGIN1      | 1.37 | 7.07E-04 | oxidative stress induced growth inhibitor 1                                                             |
| 101928229 | NA          | 1.37 | 1.96E-02 | NA                                                                                                      |
| 11080     | DNAJB4      | 1.37 | 3.84E-02 | DnaJ (Hsp40) homolog, subfamily B, member 4                                                             |
| 55062     | WIPI1       | 1.37 | 4.74E-04 | WD repeat domain, phosphoinositide interacting 1                                                        |
| 5603      | MAPK13      | 1.37 | 3.20E-02 | mitogen-activated protein kinase 13                                                                     |

|           |            |      |          |                                                                                                               |
|-----------|------------|------|----------|---------------------------------------------------------------------------------------------------------------|
| 9871      | SEC24D     | 1.37 | 9.59E-04 | SEC24 family member D                                                                                         |
| 22885     | ABLIM3     | 1.37 | 1.30E-03 | actin binding LIM protein family, member 3                                                                    |
| 84561     | SLC12A8    | 1.37 | 4.05E-03 | solute carrier family 12, member 8                                                                            |
| 79746     | ECHDC3     | 1.37 | 4.97E-03 | enoyl CoA hydratase domain containing 3                                                                       |
| 2948      | GSTM4      | 1.37 | 1.21E-02 | glutathione S-transferase mu 4                                                                                |
| 2651      | GCNT2      | 1.37 | 1.55E-02 | glucosaminyl (N-acetyl) transferase 2, I-branching enzyme (I blood group)                                     |
| 81539     | SLC38A1    | 1.37 | 1.83E-03 | solute carrier family 38, member 1                                                                            |
| 5256      | PHKA2      | 1.36 | 1.59E-03 | phosphorylase kinase, alpha 2 (liver)                                                                         |
| 22853     | LMTK2      | 1.36 | 4.74E-04 | lemur tyrosine kinase 2                                                                                       |
| 2052      | EPHX1      | 1.36 | 2.78E-04 | epoxide hydrolase 1, microsomal (xenobiotic)                                                                  |
| 79935     | CNTD2      | 1.36 | 3.61E-02 | cyclin N-terminal domain containing 2                                                                         |
| 27242     | TNFRSF21   | 1.36 | 1.29E-02 | tumor necrosis factor receptor superfamily, member 21                                                         |
| 3625      | INHBB      | 1.36 | 4.83E-02 | inhibin, beta B                                                                                               |
| 375757    | SWI5       | 1.36 | 4.25E-03 | SWI5 recombination repair homolog (yeast)                                                                     |
| 203228    | C9orf72    | 1.36 | 3.67E-03 | chromosome 9 open reading frame 72                                                                            |
| 3251      | HPRT1      | 1.36 | 4.70E-04 | hypoxanthine phosphoribosyltransferase 1                                                                      |
| 7873      | MANF       | 1.36 | 1.02E-03 | mesencephalic astrocyte-derived neurotrophic factor                                                           |
| 100130742 | LRRRC69    | 1.36 | 2.85E-02 | leucine rich repeat containing 69                                                                             |
| 493       | ATP2B4     | 1.36 | 6.31E-03 | ATPase, Ca <sup>++</sup> transporting, plasma membrane 4                                                      |
| 168451    | THAP5      | 1.36 | 3.53E-02 | THAP domain containing 5                                                                                      |
| 9942      | XYLB       | 1.36 | 5.23E-03 | xylulokinase homolog (H. influenzae)                                                                          |
| 8878      | SQSTM1     | 1.36 | 4.02E-05 | sequestosome 1                                                                                                |
| 3159      | HMGA1      | 1.35 | 8.87E-03 | high mobility group AT-hook 1                                                                                 |
| 128853    | DUSP15     | 1.35 | 1.74E-02 | dual specificity phosphatase 15                                                                               |
| 27090     | ST6GALNAC4 | 1.35 | 8.74E-04 | ST6 (alpha-N-acetyl-neuraminyl-2,3-beta-galactosyl-1,3)-N-acetylgalactosaminide alpha-2,6-sialyltransferase 4 |
| 5009      | OTC        | 1.35 | 3.01E-02 | ornithine carbamoyltransferase                                                                                |
| 6520      | SLC3A2     | 1.35 | 2.79E-04 | solute carrier family 3 (amino acid transporter heavy chain), member 2                                        |
| 26064     | RAI14      | 1.35 | 9.97E-04 | retinoic acid induced 14                                                                                      |
| 400798    | C1orf220   | 1.35 | 1.05E-02 | chromosome 1 open reading frame 220                                                                           |
| 54700     | RRN3       | 1.35 | 2.47E-02 | RRN3 RNA polymerase I transcription factor homolog (S. cerevisiae)                                            |
| 122970    | ACOT4      | 1.35 | 3.11E-02 | acyl-CoA thioesterase 4                                                                                       |
| 84681     | HINT2      | 1.35 | 1.56E-02 | histidine triad nucleotide binding protein 2                                                                  |
| 6482      | ST3GAL1    | 1.35 | 1.10E-03 | ST3 beta-galactoside alpha-2,3-sialyltransferase 1                                                            |
| 901       | CCNG2      | 1.35 | 2.46E-02 | cyclin G2                                                                                                     |
| 55728     | N4BP2      | 1.35 | 1.81E-02 | NEDD4 binding protein 2                                                                                       |
| 8209      | C21orf33   | 1.34 | 1.10E-03 | chromosome 21 open reading frame 33                                                                           |
| 548645    | DNAJC25    | 1.34 | 2.31E-03 | DnaJ (Hsp40) homolog, subfamily C, member 25                                                                  |
| 6675      | UAP1       | 1.34 | 3.83E-03 | UDP-N-acetylglucosamine pyrophosphorylase 1                                                                   |
| 2274      | FHL2       | 1.34 | 8.81E-03 | four and a half LIM domains 2                                                                                 |
| 91050     | CCDC149    | 1.34 | 2.69E-02 | coiled-coil domain containing 149                                                                             |
| 8309      | ACOX2      | 1.34 | 3.84E-02 | acyl-CoA oxidase 2, branched chain                                                                            |
| 645       | BLVRB      | 1.34 | 1.52E-03 | biliverdin reductase B (flavin reductase (NADPH))                                                             |
| 55219     | TMEM57     | 1.34 | 5.79E-03 | transmembrane protein 57                                                                                      |
| 7754      | ZNF204P    | 1.34 | 3.85E-02 | zinc finger protein 204, pseudogene                                                                           |
| 692099    | FAM86DP    | 1.34 | 8.01E-04 | family with sequence similarity 86, member D, pseudogene                                                      |
| 10126     | DNAL4      | 1.34 | 3.22E-02 | dynein, axonemal, light chain 4                                                                               |
| 5243      | ABCB1      | 1.34 | 9.46E-03 | ATP-binding cassette, sub-family B (MDR/TAP), member 1                                                        |
| 1119      | CHKA       | 1.34 | 2.72E-02 | choline kinase alpha                                                                                          |
| 58510     | PRODH2     | 1.34 | 1.24E-02 | proline dehydrogenase (oxidase) 2                                                                             |
| 643246    | MAP1LC3B2  | 1.34 | 4.21E-02 | microtubule-associated protein 1 light chain 3 beta 2                                                         |
| 9532      | BAG2       | 1.34 | 1.94E-03 | BCL2-associated athanogene 2                                                                                  |
| 27440     | CECR5      | 1.34 | 3.17E-02 | cat eye syndrome chromosome region, candidate 5                                                               |
| 4359      | MPZ        | 1.34 | 2.74E-02 | myelin protein zero                                                                                           |
| 79739     | TTL7       | 1.33 | 2.93E-02 | tubulin tyrosine ligase-like family, member 7                                                                 |
| 64816     | CYP3A43    | 1.33 | 4.90E-02 | cytochrome P450, family 3, subfamily A, polypeptide 43                                                        |
| 271       | AMPD2      | 1.33 | 7.37E-03 | adenosine monophosphate deaminase 2                                                                           |
| 8027      | STAM       | 1.33 | 1.78E-03 | signal transducing adaptor molecule (SH3 domain and ITAM motif) 1                                             |
| 9955      | HS3ST3A1   | 1.33 | 3.49E-02 | heparan sulfate (glucosamine) 3-O-sulfotransferase 3A1                                                        |
| 23753     | SDF2L1     | 1.33 | 6.72E-03 | stromal cell-derived factor 2-like 1                                                                          |
| 6786      | STIM1      | 1.33 | 1.21E-03 | stromal interaction molecule 1                                                                                |
| 135398    | C6orf1141  | 1.33 | 5.22E-03 | chromosome 6 open reading frame 1141                                                                          |
| 1373      | CPS1       | 1.33 | 5.09E-03 | carbamoyl-phosphate synthase 1, mitochondrial                                                                 |
| 26995     | TRUB2      | 1.32 | 5.56E-04 | TruB pseudouridine (psi) synthase family member 2                                                             |
| 27230     | SERP1      | 1.32 | 1.22E-03 | stress-associated endoplasmic reticulum protein 1                                                             |
| 8165      | AKAP1      | 1.32 | 1.75E-03 | A kinase (PRKA) anchor protein 1                                                                              |
| 256987    | SERINC5    | 1.32 | 2.67E-03 | serine incorporator 5                                                                                         |
| 3290      | HSD11B1    | 1.32 | 2.87E-03 | hydroxysteroid (11-beta) dehydrogenase 1                                                                      |
| 189       | AGXT       | 1.32 | 1.48E-03 | alanine-glyoxylate aminotransferase                                                                           |
| 23743     | BHMT2      | 1.32 | 4.30E-04 | betaine-homocysteine S-methyltransferase 2                                                                    |
| 27347     | STK39      | 1.32 | 3.73E-02 | serine threonine kinase 39                                                                                    |
| 171586    | ABHD3      | 1.32 | 6.31E-03 | abhydrolase domain containing 3                                                                               |
| 3081      | HGD        | 1.32 | 2.11E-02 | homogentisate 1,2-dioxygenase                                                                                 |
| 8412      | BCAR3      | 1.32 | 1.69E-02 | breast cancer anti-estrogen resistance 3                                                                      |
| 79003     | MIS12      | 1.32 | 1.07E-02 | MIS12 kinetochore complex component                                                                           |
| 493856    | CISD2      | 1.31 | 1.83E-02 | CDGSH iron sulfur domain 2                                                                                    |
| 10726     | NUDC       | 1.31 | 1.28E-03 | nudC nuclear distribution protein                                                                             |
| 84288     | EFCAB2     | 1.31 | 3.61E-02 | EF-hand calcium binding domain 2                                                                              |
| 55974     | SLC50A1    | 1.31 | 7.27E-03 | solute carrier family 50 (sugar efflux transporter), member 1                                                 |
| 79701     | OGFOD3     | 1.31 | 1.23E-02 | 2-oxoglutarate and iron-dependent oxygenase domain containing 3                                               |
| 114907    | FBXO32     | 1.30 | 3.00E-02 | F-box protein 32                                                                                              |
| 399665    | FAM102A    | 1.30 | 1.71E-02 | family with sequence similarity 102, member A                                                                 |
| 1050      | CEBPA      | 1.30 | 2.46E-02 | CCAAT/enhancer binding protein (C/EBP), alpha                                                                 |
| 6836      | SURF4      | 1.30 | 4.36E-04 | surfeit 4                                                                                                     |
| 2878      | GPX3       | 1.30 | 2.47E-03 | glutathione peroxidase 3 (plasma)                                                                             |
| 51651     | PTRH2      | 1.30 | 1.83E-02 | peptidyl-HRNA hydrolase 2                                                                                     |
| 84513     | PPAPDC1B   | 1.30 | 6.39E-03 | phosphatidic acid phosphatase type 2 domain containing 1B                                                     |
| 7068      | THRB       | 1.30 | 4.82E-02 | thyroid hormone receptor, beta                                                                                |
| 202915    | TMEM184A   | 1.30 | 1.54E-02 | transmembrane protein 184A                                                                                    |
| 84447     | SYVN1      | 1.30 | 5.23E-03 | synovial apoptosis inhibitor 1, synoviolin                                                                    |
| 8565      | YARS       | 1.30 | 1.34E-03 | tyrosyl-tRNA synthetase                                                                                       |
| 2770      | GNAI1      | 1.30 | 4.79E-02 | guanine nucleotide binding protein (G protein), alpha inhibiting activity polypeptide 1                       |
| 83752     | LONP2      | 1.30 | 1.30E-03 | lon peptidase 2, peroxisomal                                                                                  |
| 56261     | GPCPD1     | 1.30 | 4.59E-02 | glycerophosphocholine phosphodiesterase GDE1 homolog (S. cerevisiae)                                          |
| 157922    | CAMSAP1    | 1.30 | 5.74E-03 | calmodulin regulated spectrin-associated protein 1                                                            |
| 25791     | NGEF       | 1.30 | 3.85E-02 | neuronal guanine nucleotide exchange factor                                                                   |
| 219743    | TYSND1     | 1.30 | 1.00E-02 | trypsin domain containing 1                                                                                   |
| 29968     | PSAT1      | 1.30 | 3.16E-02 | phosphoserine aminotransferase 1                                                                              |
| 286343    | LURAP1L    | 1.29 | 2.66E-02 | leucine rich adaptor protein 1-like                                                                           |
| 3775      | KCNK1      | 1.29 | 2.11E-02 | potassium channel, subfamily K, member 1                                                                      |
| 2035      | EPB41      | 1.29 | 1.00E-02 | erythrocyte membrane protein band 4.1 (elliptocytosis 1, RH-linked)                                           |
| 3655      | ITGA6      | 1.29 | 2.42E-03 | integrin, alpha 6                                                                                             |

|        |            |      |          |                                                                                                                 |
|--------|------------|------|----------|-----------------------------------------------------------------------------------------------------------------|
| 11162  | NUDT6      | 1.29 | 3.01E-02 | nudix (nucleoside diphosphate linked moiety X)-type motif 6                                                     |
| 10165  | SLC25A13   | 1.29 | 3.83E-03 | solute carrier family 25 (aspartate/glutamate carrier), member 13                                               |
| 2717   | GLA        | 1.29 | 1.78E-03 | galactosidase, alpha                                                                                            |
| 55343  | SLC35C1    | 1.29 | 4.90E-02 | solute carrier family 35 (GDP-fucose transporter), member C1                                                    |
| 79161  | TMEM243    | 1.29 | 3.00E-02 | transmembrane protein 243, mitochondrial                                                                        |
| 2109   | ETFB       | 1.29 | 5.58E-03 | electron-transfer-flavoprotein, beta polypeptide                                                                |
| 27304  | MOCS3      | 1.29 | 4.82E-02 | molybdenum cofactor synthesis 3                                                                                 |
| 51136  | RNFT1      | 1.29 | 1.17E-02 | ring finger protein, transmembrane 1                                                                            |
| 114818 | KLHL29     | 1.29 | 1.24E-02 | kelch-like family member 29                                                                                     |
| 3693   | ITGB5      | 1.29 | 2.71E-03 | integrin, beta 5                                                                                                |
| 283464 | GXYLT1     | 1.29 | 2.17E-03 | glucoside xylosyltransferase 1                                                                                  |
| 23576  | DDAH1      | 1.29 | 2.09E-03 | dimethylarginine dimethylaminohydrolase 1                                                                       |
| 79594  | MUL1       | 1.29 | 1.48E-02 | mitochondrial E3 ubiquitin protein ligase 1                                                                     |
| 1491   | CTH        | 1.29 | 3.96E-02 | cystathionase (cystathionine gamma-lyase)                                                                       |
| 11260  | XPOT       | 1.28 | 9.69E-03 | exportin, tRNA                                                                                                  |
| 7371   | UCK2       | 1.28 | 6.56E-03 | uridine-cytidine kinase 2                                                                                       |
| 9821   | RB1CC1     | 1.28 | 2.28E-03 | RB1-inducible coiled-coil 1                                                                                     |
| 196410 | METTL7B    | 1.28 | 1.53E-02 | methyltransferase like 7B                                                                                       |
| 9697   | TRAM2      | 1.28 | 2.19E-03 | translocation associated membrane protein 2                                                                     |
| 200933 | FBXO45     | 1.28 | 2.35E-02 | F-box protein 45                                                                                                |
| 3032   | HADHB      | 1.28 | 1.95E-03 | hydroxyacyl-CoA dehydrogenase/3-ketoacyl-CoA thiolase/enoyl-CoA hydratase (trifunctional protein), beta subunit |
| 152641 | WWC2-AS2   | 1.28 | 2.03E-02 | WWC2 antisense RNA 2                                                                                            |
| 9975   | NR1D2      | 1.28 | 4.04E-03 | nuclear receptor subfamily 1, group D, member 2                                                                 |
| 29958  | DMGDH      | 1.28 | 3.89E-02 | dimethylglycine dehydrogenase                                                                                   |
| 57161  | PELI2      | 1.28 | 1.03E-02 | pellino E3 ubiquitin protein ligase family member 2                                                             |
| 51099  | ABHD5      | 1.28 | 3.68E-02 | abhydrolase domain containing 5                                                                                 |
| 8366   | HIST1H4B   | 1.28 | 4.05E-02 | histone cluster 1, H4b                                                                                          |
| 10397  | NDRG1      | 1.28 | 1.32E-02 | N-myc downstream regulated 1                                                                                    |
| 29925  | GMPPB      | 1.28 | 1.33E-02 | GDP-mannose pyrophosphorylase B                                                                                 |
| 5795   | PTPRJ      | 1.28 | 7.07E-03 | protein tyrosine phosphatase, receptor type, J                                                                  |
| 85377  | MICALL1    | 1.28 | 4.87E-02 | MICAL-like 1                                                                                                    |
| 6249   | CLIP1      | 1.28 | 9.72E-04 | CAP-GLY domain containing linker protein 1                                                                      |
| 7922   | SLC39A7    | 1.28 | 3.02E-03 | solute carrier family 39 (zinc transporter), member 7                                                           |
| 9093   | DNAJA3     | 1.28 | 2.42E-03 | DnaJ (Hsp40) homolog, subfamily A, member 3                                                                     |
| 80218  | NAA50      | 1.28 | 3.30E-04 | N(alpha)-acetyltransferase 50, NatE catalytic subunit                                                           |
| 55605  | KIF21A     | 1.28 | 4.19E-03 | kinesin family member 21A                                                                                       |
| 25850  | ZNF345     | 1.28 | 4.54E-02 | zinc finger protein 345                                                                                         |
| 84725  | PLEKHA8    | 1.28 | 3.54E-02 | pleckstrin homology domain containing, family A (phosphoinositide binding specific) member 8                    |
| 55435  | APIAR      | 1.28 | 4.96E-03 | adaptor-related protein complex 1 associated regulatory protein                                                 |
| 10560  | SLC19A2    | 1.27 | 3.17E-02 | solute carrier family 19 (thiamine transporter), member 2                                                       |
| 84818  | IL17RC     | 1.27 | 2.95E-02 | interleukin 17 receptor C                                                                                       |
| 23277  | CLUH       | 1.27 | 1.55E-03 | clustered mitochondria (cluA/CLU1) homolog                                                                      |
| 216    | ALDH1A1    | 1.27 | 8.23E-03 | aldehyde dehydrogenase 1 family, member A1                                                                      |
| 5053   | PAH        | 1.27 | 4.16E-02 | phenylalanine hydroxylase                                                                                       |
| 133    | ADM        | 1.27 | 2.75E-02 | adrenomedullin                                                                                                  |
| 28955  | DEX1       | 1.27 | 3.71E-02 | Dex1 homolog (mouse)                                                                                            |
| 91526  | ANKRD44    | 1.27 | 8.26E-03 | ankyrin repeat domain 44                                                                                        |
| 9980   | DOPEY2     | 1.27 | 2.80E-02 | dopey family member 2                                                                                           |
| 2247   | FGF2       | 1.27 | 1.70E-02 | fibroblast growth factor 2 (basic)                                                                              |
| 83606  | GUCD1      | 1.27 | 8.74E-04 | guanylyl cyclase domain containing 1                                                                            |
| 64755  | C16orf58   | 1.27 | 8.02E-03 | chromosome 16 open reading frame 58                                                                             |
| 2646   | GCKR       | 1.27 | 2.82E-02 | glucokinase (hexokinase 4) regulator                                                                            |
| 5062   | PAK2       | 1.27 | 8.74E-04 | p21 protein (Cdc42/Rac)-activated kinase 2                                                                      |
| 1843   | DUSP1      | 1.27 | 4.50E-04 | dual specificity phosphatase 1                                                                                  |
| 5217   | PFN2       | 1.27 | 4.91E-03 | profilin 2                                                                                                      |
| 51114  | ZDHHC9     | 1.27 | 2.55E-03 | zinc finger, DHHC-type containing 9                                                                             |
| 64216  | TFB2M      | 1.27 | 7.34E-03 | transcription factor B2, mitochondrial                                                                          |
| 201232 | SLC16A13   | 1.27 | 1.42E-02 | solute carrier family 16, member 13                                                                             |
| 57414  | RHBD2      | 1.27 | 7.75E-03 | rhomboid domain containing 2                                                                                    |
| 56288  | PARD3      | 1.27 | 7.37E-04 | par-3 family cell polarity regulator                                                                            |
| 3741   | KCNA5      | 1.27 | 4.52E-02 | potassium voltage-gated channel, shaker-related subfamily, member 5                                             |
| 2872   | MKNK2      | 1.27 | 3.98E-02 | MAP kinase interacting serine/threonine kinase 2                                                                |
| 10483  | SEC23B     | 1.26 | 3.44E-03 | Sec23 homolog B (S. cerevisiae)                                                                                 |
| 56997  | ADCK3      | 1.26 | 4.95E-02 | aarF domain containing kinase 3                                                                                 |
| 121260 | SLC15A4    | 1.26 | 1.01E-02 | solute carrier family 15 (oligopeptide transporter), member 4                                                   |
| 22928  | SEPHS2     | 1.26 | 3.48E-03 | selenophosphate synthetase 2                                                                                    |
| 5387   | PMS2P3     | 1.26 | 1.24E-02 | postmeiotic segregation increased 2 pseudogene 3                                                                |
| 4953   | ODC1       | 1.26 | 1.79E-03 | ornithine decarboxylase 1                                                                                       |
| 57834  | CYP4F11    | 1.26 | 2.04E-02 | cytochrome P450, family 4, subfamily F, polypeptide 11                                                          |
| 5621   | PRNP       | 1.26 | 3.26E-03 | prion protein                                                                                                   |
| 29088  | MRPL15     | 1.26 | 4.38E-02 | mitochondrial ribosomal protein L15                                                                             |
| 79144  | PPDPF      | 1.26 | 1.78E-02 | pancreatic progenitor cell differentiation and proliferation factor                                             |
| 29926  | GMPPA      | 1.26 | 8.97E-03 | GDP-mannose pyrophosphorylase A                                                                                 |
| 23223  | RRP12      | 1.26 | 4.19E-03 | ribosomal RNA processing 12 homolog (S. cerevisiae)                                                             |
| 55330  | BLOC1S4    | 1.26 | 4.91E-02 | biogenesis of lysosomal organelles complex-1, subunit 4, cappuccino                                             |
| 10525  | HYOU1      | 1.26 | 1.19E-02 | hypoxia up-regulated 1                                                                                          |
| 1978   | EIF4EBP1   | 1.26 | 2.50E-02 | eukaryotic translation initiation factor 4E binding protein 1                                                   |
| 1579   | CYP4A11    | 1.26 | 3.27E-02 | cytochrome P450, family 4, subfamily A, polypeptide 11                                                          |
| 51058  | ZNF691     | 1.26 | 4.33E-02 | zinc finger protein 691                                                                                         |
| 54929  | TMEM161A   | 1.26 | 4.43E-02 | transmembrane protein 161A                                                                                      |
| 63893  | UBE2O      | 1.26 | 1.42E-02 | ubiquitin-conjugating enzyme E2O                                                                                |
| 10400  | PEMT       | 1.26 | 1.11E-02 | phosphatidylethanolamine N-methyltransferase                                                                    |
| 6782   | HSPA13     | 1.26 | 2.76E-03 | heat shock protein 70kDa family, member 13                                                                      |
| 22809  | ATF5       | 1.26 | 1.18E-02 | activating transcription factor 5                                                                               |
| 254887 | ZDHHC23    | 1.26 | 1.05E-02 | zinc finger, DHHC-type containing 23                                                                            |
| 9570   | GOSR2      | 1.26 | 6.56E-03 | golgi SNAP receptor complex member 2                                                                            |
| 84649  | DGAT2      | 1.25 | 3.46E-02 | diacylglycerol O-acyltransferase 2                                                                              |
| 79875  | THSD4      | 1.25 | 3.73E-02 | thrombospondin, type I, domain containing 4                                                                     |
| 55884  | WSB2       | 1.25 | 4.75E-03 | WD repeat and SOCS box containing 2                                                                             |
| 7923   | HSD17B8    | 1.25 | 9.05E-03 | hydroxysteroid (17-beta) dehydrogenase 8                                                                        |
| 134147 | CMBL       | 1.25 | 1.03E-02 | carboxymethylenebutenolidase homolog (Pseudomonas)                                                              |
| 8608   | RDH16      | 1.25 | 3.60E-02 | retinol dehydrogenase 16 (all-trans)                                                                            |
| 2669   | GEM        | 1.25 | 1.83E-02 | GTP binding protein overexpressed in skeletal muscle                                                            |
| 144811 | LACC1      | 1.25 | 1.29E-02 | laccase (multicopper oxidoreductase) domain containing 1                                                        |
| 221756 | SERPINB9P1 | 1.25 | 4.95E-02 | serpin peptidase inhibitor, clade B (ovalbumin), member 9, pseudogene 1                                         |
| 7132   | TNFRSF1A   | 1.25 | 2.76E-03 | tumor necrosis factor receptor superfamily, member 1A                                                           |
| 8439   | NSMAF      | 1.25 | 1.97E-02 | neutral sphingomyelinase (N-SMase) activation associated factor                                                 |
| 55132  | LARP1B     | 1.25 | 3.17E-02 | La ribonucleoprotein domain family, member 1B                                                                   |
| 9429   | ABC62      | 1.25 | 3.67E-02 | ATP-binding cassette, sub-family G (WHITE), member 2                                                            |
| 200844 | C3orf67    | 1.25 | 2.98E-02 | chromosome 3 open reading frame 67                                                                              |
| 29914  | UBIAD1     | 1.25 | 1.47E-02 | UbiA prenyltransferase domain containing 1                                                                      |

|        |          |      |          |                                                                                                                  |
|--------|----------|------|----------|------------------------------------------------------------------------------------------------------------------|
| 56947  | MFF      | 1.24 | 9.39E-03 | mitochondrial fission factor                                                                                     |
| 9689   | BZW1     | 1.24 | 1.29E-02 | basic leucine zipper and W2 domains 1                                                                            |
| 10099  | TSPAN3   | 1.24 | 3.96E-03 | tetraspanin 3                                                                                                    |
| 10933  | MORF4L1  | 1.24 | 1.62E-02 | mortality factor 4 like 1                                                                                        |
| 8187   | ZNF239   | 1.24 | 4.52E-02 | zinc finger protein 239                                                                                          |
| 30836  | DNTTIP2  | 1.24 | 7.07E-03 | deoxynucleotidyltransferase, terminal, interacting protein 2                                                     |
| 5565   | PRKAB2   | 1.24 | 2.10E-02 | protein kinase, AMP-activated, beta 2 non-catalytic subunit                                                      |
| 84085  | FBXO30   | 1.24 | 1.77E-03 | F-box protein 30                                                                                                 |
| 5830   | PEX5     | 1.24 | 7.83E-03 | peroxisomal biogenesis factor 5                                                                                  |
| 54867  | TMEM214  | 1.24 | 1.66E-02 | transmembrane protein 214                                                                                        |
| 347735 | SERINC2  | 1.24 | 1.54E-02 | serine incorporator 2                                                                                            |
| 5164   | PDK2     | 1.24 | 3.99E-02 | pyruvate dehydrogenase kinase, isozyme 2                                                                         |
| 26777  | SNORA71A | 1.24 | 2.47E-02 | small nucleolar RNA, H/ACA box 71A                                                                               |
| 23483  | TGDS     | 1.24 | 8.81E-03 | TDP-glucose 4,6-dehydratase                                                                                      |
| 7184   | HSP90B1  | 1.24 | 1.56E-03 | heat shock protein 90kDa beta (Grp94), member 1                                                                  |
| 60314  | C12orf10 | 1.24 | 1.55E-02 | chromosome 12 open reading frame 10                                                                              |
| 51582  | AZIN1    | 1.23 | 7.57E-04 | antizyme inhibitor 1                                                                                             |
| 221656 | KDM1B    | 1.23 | 1.34E-02 | lysine (K)-specific demethylase 1B                                                                               |
| 84336  | TMEM101  | 1.23 | 4.08E-02 | transmembrane protein 101                                                                                        |
| 10613  | ERLIN1   | 1.23 | 2.22E-02 | ER lipid raft associated 1                                                                                       |
| 3998   | LMAN1    | 1.23 | 1.55E-02 | lectin, mannose-binding, 1                                                                                       |
| 162989 | DEDD2    | 1.23 | 4.10E-02 | death effector domain containing 2                                                                               |
| 23139  | MAST2    | 1.23 | 8.15E-03 | microtubule associated serine/threonine kinase 2                                                                 |
| 10598  | AHSA1    | 1.23 | 1.84E-03 | AHA1, activator of heat shock 90kDa protein ATPase homolog 1 (yeast)                                             |
| 64795  | RMND5A   | 1.23 | 4.95E-02 | required for meiotic nuclear division 5 homolog A (S. cerevisiae)                                                |
| 64425  | POLR1E   | 1.23 | 2.08E-02 | polymerase (RNA) I polypeptide E, 53kDa                                                                          |
| 54676  | GTPBP2   | 1.23 | 2.92E-02 | GTP binding protein 2                                                                                            |
| 153241 | CEP120   | 1.23 | 4.82E-02 | centrosomal protein 120kDa                                                                                       |
| 360023 | ZBTB41   | 1.23 | 3.01E-02 | zinc finger and BTB domain containing 41                                                                         |
| 63971  | KIF13A   | 1.23 | 1.16E-02 | kinesin family member 13A                                                                                        |
| 79018  | GID4     | 1.23 | 4.71E-02 | GID complex subunit 4                                                                                            |
| 55313  | CPPED1   | 1.23 | 2.45E-03 | calcineurin-like phosphoesterase domain containing 1                                                             |
| 58477  | SRPRB    | 1.23 | 2.54E-03 | signal recognition particle receptor, B subunit                                                                  |
| 51649  | MRPS23   | 1.23 | 3.70E-02 | mitochondrial ribosomal protein S23                                                                              |
| 7514   | XPO1     | 1.23 | 7.72E-03 | exportin 1                                                                                                       |
| 64175  | LEPRE1   | 1.23 | 3.41E-02 | leucine proline-enriched proteoglycan (leprecan) 1                                                               |
| 978    | CDA      | 1.22 | 1.86E-02 | cytidine deaminase                                                                                               |
| 11108  | PRDM4    | 1.22 | 1.28E-02 | PR domain containing 4                                                                                           |
| 7071   | KLF10    | 1.22 | 5.44E-03 | Kruppel-like factor 10                                                                                           |
| 96610  | BMS1P20  | 1.22 | 2.96E-02 | BMS1 pseudogene 20                                                                                               |
| 90411  | MCFD2    | 1.22 | 6.31E-03 | multiple coagulation factor deficiency 2                                                                         |
| 7165   | TPD52L2  | 1.22 | 4.91E-03 | tumor protein D52-like 2                                                                                         |
| 3030   | HADHA    | 1.22 | 1.70E-02 | hydroxyacyl-CoA dehydrogenase/3-ketoacyl-CoA thiolase/enoyl-CoA hydratase (trifunctional protein), alpha subunit |
| 5167   | ENPP1    | 1.22 | 1.11E-02 | ectonucleotide pyrophosphatase/phosphodiesterase 1                                                               |
| 50640  | PNPLA8   | 1.22 | 2.19E-02 | patatin-like phospholipase domain containing 8                                                                   |
| 64771  | C6orf106 | 1.22 | 8.02E-03 | chromosome 6 open reading frame 106                                                                              |
| 375035 | SFT2D2   | 1.22 | 1.94E-02 | SFT2 domain containing 2                                                                                         |
| 26207  | PITPNC1  | 1.22 | 9.59E-03 | phosphatidylinositol transfer protein, cytoplasmic 1                                                             |
| 26151  | NAT9     | 1.22 | 2.75E-02 | N-acetyltransferase 9 (GCN5-related, putative)                                                                   |
| 5412   | UBL3     | 1.22 | 9.85E-03 | ubiquitin-like 3                                                                                                 |
| 27248  | ERLEC1   | 1.22 | 2.49E-02 | endoplasmic reticulum lectin 1                                                                                   |
| 91252  | SLC39A13 | 1.22 | 2.42E-02 | solute carrier family 39 (zinc transporter), member 13                                                           |
| 9557   | CHD1L    | 1.22 | 3.63E-02 | chromodomain helicase DNA binding protein 1-like                                                                 |
| 54469  | ZFAND6   | 1.22 | 3.09E-02 | zinc finger, AN1-type domain 6                                                                                   |
| 10196  | PRMT3    | 1.22 | 2.69E-02 | protein arginine methyltransferase 3                                                                             |
| 80273  | GRPEL1   | 1.22 | 7.67E-03 | GrpE-like 1, mitochondrial (E. coli)                                                                             |
| 10838  | ZNF275   | 1.22 | 2.47E-02 | zinc finger protein 275                                                                                          |
| 51566  | ARMCX3   | 1.22 | 3.95E-02 | armadillo repeat containing, X-linked 3                                                                          |
| 26608  | TBL2     | 1.22 | 4.81E-02 | transducin (beta)-like 2                                                                                         |
| 9917   | FAM20B   | 1.21 | 1.10E-02 | family with sequence similarity 20, member B                                                                     |
| 7419   | VDAC3    | 1.21 | 5.82E-04 | voltage-dependent anion channel 3                                                                                |
| 54517  | PUS7     | 1.21 | 1.76E-02 | pseudouridylyl synthase 7 (putative)                                                                             |
| 3295   | HSD17B4  | 1.21 | 1.41E-02 | hydroxysteroid (17-beta) dehydrogenase 4                                                                         |
| 400    | ARL1     | 1.21 | 2.02E-02 | ADP-ribosylation factor-like 1                                                                                   |
| 8907   | AP1M1    | 1.21 | 3.82E-02 | adaptor-related protein complex 1, mu 1 subunit                                                                  |
| 5054   | SERPINE1 | 1.21 | 2.61E-02 | serpin peptidase inhibitor, clade E (nexin, plasminogen activator inhibitor type 1), member 1                    |
| 8100   | IFT88    | 1.21 | 2.46E-02 | intraflagellar transport 88 homolog (Chlamydomonas)                                                              |
| 85379  | KIAA1671 | 1.21 | 1.10E-02 | KIAA1671                                                                                                         |
| 2801   | GOLGA2   | 1.21 | 1.67E-02 | golgin A2                                                                                                        |
| 10322  | SMYD5    | 1.21 | 2.74E-02 | SMYD family member 5                                                                                             |
| 4780   | NFE2L2   | 1.21 | 1.39E-02 | nuclear factor, erythroid 2-like 2                                                                               |
| 84919  | PPP1R15B | 1.21 | 2.14E-02 | protein phosphatase 1, regulatory subunit 15B                                                                    |
| 57222  | ERGIC1   | 1.21 | 4.17E-03 | endoplasmic reticulum-golgi intermediate compartment (ERGIC) 1                                                   |
| 27075  | TSPAN13  | 1.20 | 3.73E-02 | tetraspanin 13                                                                                                   |
| 4199   | ME1      | 1.20 | 1.04E-02 | malic enzyme 1, NADP(+)-dependent, cytosolic                                                                     |
| 91272  | BOD1     | 1.20 | 1.49E-02 | biorientation of chromosomes in cell division 1                                                                  |
| 5467   | PPARD    | 1.20 | 3.13E-02 | peroxisome proliferator-activated receptor delta                                                                 |
| 9146   | HGS      | 1.20 | 1.70E-02 | hepatocyte growth factor-regulated tyrosine kinase substrate                                                     |
| 56647  | BCCIP    | 1.20 | 3.36E-02 | BRCA2 and CDKN1A interacting protein                                                                             |
| 1979   | EIF4EBP2 | 1.20 | 2.57E-03 | eukaryotic translation initiation factor 4E binding protein 2                                                    |
| 56683  | C21orf59 | 1.20 | 1.20E-02 | chromosome 21 open reading frame 59                                                                              |
| 6746   | SSR2     | 1.20 | 1.11E-02 | signal sequence receptor, beta (translocon-associated protein beta)                                              |
| 4233   | MET      | 1.20 | 3.45E-02 | met proto-oncogene                                                                                               |
| 7965   | AIMP2    | 1.20 | 1.70E-02 | aminoacyl tRNA synthetase complex-interacting multifunctional protein 2                                          |
| 6683   | SPAST    | 1.20 | 1.56E-02 | spastin                                                                                                          |
| 1317   | SLC31A1  | 1.20 | 2.19E-02 | solute carrier family 31 (copper transporter), member 1                                                          |
| 7295   | TXN      | 1.20 | 1.00E-02 | thioredoxin                                                                                                      |
| 6780   | STAU1    | 1.20 | 3.62E-03 | staufen double-stranded RNA binding protein 1                                                                    |
| 134553 | C5orf24  | 1.20 | 3.17E-02 | chromosome 5 open reading frame 24                                                                               |
| 81671  | VMP1     | 1.20 | 1.94E-03 | vacuole membrane protein 1                                                                                       |
| 56910  | STARD7   | 1.20 | 3.38E-03 | STAR-related lipid transfer (START) domain containing 7                                                          |
| 1497   | CTNS     | 1.20 | 2.93E-02 | cystinosis, lysosomal cystine transporter                                                                        |
| 5686   | PSMA5    | 1.20 | 3.64E-02 | proteasome (prosome, macropain) subunit, alpha type, 5                                                           |
| 55829  | VIMP     | 1.20 | 3.25E-02 | VCP-interacting membrane protein                                                                                 |
| 11046  | SLC35D2  | 1.20 | 2.81E-02 | solute carrier family 35 (UDP-GlcNAc/UDP-glucose transporter), member D2                                         |
| 10455  | ECI2     | 1.19 | 9.14E-03 | enoyl-CoA delta isomerase 2                                                                                      |
| 6732   | SRPK1    | 1.19 | 2.45E-02 | SRSF protein kinase 1                                                                                            |
| 7764   | ZNF217   | 1.19 | 3.37E-02 | zinc finger protein 217                                                                                          |
| 51061  | TXNDC11  | 1.19 | 3.67E-02 | thioredoxin domain containing 11                                                                                 |
| 8772   | FADD     | 1.19 | 3.69E-02 | Fas (TNFRSF6)-associated via death domain                                                                        |
| 10953  | TOMM34   | 1.19 | 1.34E-02 | translocase of outer mitochondrial membrane 34                                                                   |

|        |          |      |          |                                                                                                     |
|--------|----------|------|----------|-----------------------------------------------------------------------------------------------------|
| 63929  | XPNPEP3  | 1.19 | 4.99E-02 | X-prolyl aminopeptidase (aminopeptidase P) 3, putative                                              |
| 10130  | PDIA6    | 1.19 | 2.18E-02 | protein disulfide isomerase family A, member 6                                                      |
| 29855  | UBN1     | 1.19 | 4.92E-02 | ubiquitin 1                                                                                         |
| 7813   | EV15     | 1.19 | 3.70E-02 | ecotropic viral integration site 5                                                                  |
| 10728  | PTGES3   | 1.19 | 1.75E-02 | prostaglandin E synthase 3 (cytosolic)                                                              |
| 9184   | BUB3     | 1.19 | 3.57E-02 | BUB3 mitotic checkpoint protein                                                                     |
| 10120  | ACTR1B   | 1.19 | 3.47E-02 | ARP1 actin-related protein 1 homolog B, contractin beta (yeast)                                     |
| 4257   | MGST1    | 1.19 | 5.78E-03 | microsomal glutathione S-transferase 1                                                              |
| 613    | BCR      | 1.19 | 4.16E-02 | breakpoint cluster region                                                                           |
| 8630   | HSD17B6  | 1.19 | 2.10E-02 | hydroxysteroid (17-beta) dehydrogenase 6                                                            |
| 23230  | VPS13A   | 1.19 | 2.88E-02 | vacuolar protein sorting 13 homolog A (S. cerevisiae)                                               |
| 26354  | GNL3     | 1.19 | 1.40E-02 | guanine nucleotide binding protein-like 3 (nucleolar)                                               |
| 10885  | WDR3     | 1.19 | 2.75E-02 | WD repeat domain 3                                                                                  |
| 25923  | ATL3     | 1.19 | 6.77E-03 | atlastin GTPase 3                                                                                   |
| 84522  | JAGN1    | 1.19 | 3.31E-02 | jagunal homolog 1 (Drosophila)                                                                      |
| 25888  | ZNF473   | 1.19 | 3.55E-02 | zinc finger protein 473                                                                             |
| 55907  | CMAS     | 1.19 | 4.84E-02 | cytidine monophosphate N-acetylneuraminic acid synthetase                                           |
| 127262 | TPRG1L   | 1.19 | 4.14E-02 | tumor protein p63 regulated 1-like                                                                  |
| 22931  | RAB18    | 1.18 | 8.02E-03 | RAB18, member RAS oncogene family                                                                   |
| 85021  | REPS1    | 1.18 | 5.26E-03 | RALBP1 associated Eps domain containing 1                                                           |
| 9950   | GOLGA5   | 1.18 | 4.72E-02 | golgin A5                                                                                           |
| 142891 | SAMD8    | 1.18 | 1.56E-02 | sterile alpha motif domain containing 8                                                             |
| 8886   | DDX18    | 1.18 | 1.29E-02 | DEAD (Asp-Glu-Ala-Asp) box polypeptide 18                                                           |
| 58513  | EPS15L1  | 1.18 | 3.86E-02 | epidermal growth factor receptor pathway substrate 15-like 1                                        |
| 7342   | UBP1     | 1.18 | 2.89E-02 | upstream binding protein 1 (LBP-1a)                                                                 |
| 7267   | TTC3     | 1.18 | 3.24E-02 | tetratricopeptide repeat domain 3                                                                   |
| 50865  | HEBP1    | 1.18 | 4.12E-02 | heme binding protein 1                                                                              |
| 51430  | SUCO     | 1.18 | 2.47E-02 | SUN domain containing ossification factor                                                           |
| 6868   | ADAM17   | 1.18 | 3.15E-02 | ADAM metalloproteinase domain 17                                                                    |
| 116064 | LRRRC58  | 1.18 | 3.71E-02 | leucine rich repeat containing 58                                                                   |
| 9921   | RNF10    | 1.18 | 1.38E-02 | ring finger protein 10                                                                              |
| 9043   | SPAG9    | 1.18 | 4.48E-02 | sperm associated antigen 9                                                                          |
| 22937  | SCAP     | 1.18 | 2.98E-02 | SREBF chaperone                                                                                     |
| 92140  | MTDH     | 1.18 | 6.72E-03 | metadherin                                                                                          |
| 30     | ACAA1    | 1.18 | 1.15E-02 | acetyl-CoA acyltransferase 1                                                                        |
| 8882   | ZPR1     | 1.18 | 2.36E-02 | ZPR1 zinc finger                                                                                    |
| 57587  | KIAA1430 | 1.18 | 1.97E-02 | KIAA1430                                                                                            |
| 200734 | SPRED2   | 1.18 | 3.34E-02 | sprouty-related, EVH1 domain containing 2                                                           |
| 8476   | CDC42BPA | 1.18 | 3.17E-02 | CDC42 binding protein kinase alpha (DMPK-like)                                                      |
| 55760  | DHX32    | 1.17 | 1.49E-02 | DEAH (Asp-Glu-Ala-His) box polypeptide 32                                                           |
| 55003  | PAK1IP1  | 1.17 | 1.97E-02 | PAK1 interacting protein 1                                                                          |
| 2288   | FKBP4    | 1.17 | 2.65E-02 | FK506 binding protein 4, 59kDa                                                                      |
| 262    | AMD1     | 1.17 | 2.30E-02 | adenosylmethionine decarboxylase 1                                                                  |
| 80854  | SETD7    | 1.17 | 7.61E-03 | SET domain containing (lysine methyltransferase) 7                                                  |
| 7110   | TMF1     | 1.17 | 1.86E-02 | TATA element modulatory factor 1                                                                    |
| 51012  | SLMO2    | 1.17 | 2.96E-02 | slowmo homolog 2 (Drosophila)                                                                       |
| 10105  | PIIF     | 1.17 | 2.82E-02 | peptidylprolyl isomerase F                                                                          |
| 84246  | MED10    | 1.17 | 2.83E-02 | mediator complex subunit 10                                                                         |
| 3633   | INPP5B   | 1.17 | 4.68E-02 | inositol polyphosphate 5-phosphatase, 75kDa                                                         |
| 169200 | TMEM64   | 1.17 | 2.18E-02 | transmembrane protein 64                                                                            |
| 85403  | EAF1     | 1.17 | 1.70E-02 | ELL associated factor 1                                                                             |
| 9731   | CEP104   | 1.17 | 3.01E-02 | centrosomal protein 104kDa                                                                          |
| 7106   | TSPAN4   | 1.17 | 2.74E-02 | tetraspanin 4                                                                                       |
| 9475   | ROCK2    | 1.17 | 1.93E-02 | Rho-associated, coiled-coil containing protein kinase 2                                             |
| 55127  | HEATR1   | 1.17 | 4.95E-02 | HEAT repeat containing 1                                                                            |
| 55667  | DENN4D   | 1.17 | 2.81E-02 | DENN/MADD domain containing 4C                                                                      |
| 58472  | SQRDL    | 1.17 | 4.00E-02 | sulfide quinone reductase-like (yeast)                                                              |
| 5929   | RBBP5    | 1.17 | 4.78E-02 | retinoblastoma binding protein 5                                                                    |
| 22870  | PFP6R1   | 1.17 | 3.57E-02 | protein phosphatase 6, regulatory subunit 1                                                         |
| 3459   | IFNGR1   | 1.17 | 2.76E-03 | interferon gamma receptor 1                                                                         |
| 9654   | TTL4     | 1.17 | 3.20E-02 | tubulin tyrosine ligase-like family, member 4                                                       |
| 1604   | CD55     | 1.17 | 3.17E-02 | CD55 molecule, decay accelerating factor for complement (Cromer blood group)                        |
| 3692   | EIF6     | 1.17 | 5.00E-02 | eukaryotic translation initiation factor 6                                                          |
| 5352   | PLOD2    | 1.16 | 4.45E-02 | procollagen-lysine, 2-oxoglutarate 5-dioxygenase 2                                                  |
| 4170   | MCL1     | 1.16 | 1.08E-02 | myeloid cell leukemia 1                                                                             |
| 26003  | GORASP2  | 1.16 | 1.54E-02 | golgi reassembly stacking protein 2, 55kDa                                                          |
| 2317   | FLNB     | 1.16 | 2.14E-02 | filamin B, beta                                                                                     |
| 4927   | NUP88    | 1.16 | 3.98E-02 | nucleoporin 88kDa                                                                                   |
| 2803   | GOLGA4   | 1.16 | 8.74E-03 | golgin A4                                                                                           |
| 155061 | ZNF746   | 1.16 | 3.54E-02 | zinc finger protein 746                                                                             |
| 55054  | ATG16L1  | 1.16 | 4.94E-02 | autophagy related 16-like 1 (S. cerevisiae)                                                         |
| 1983   | EIF5     | 1.16 | 2.47E-02 | eukaryotic translation initiation factor 5                                                          |
| 26100  | WIPI2    | 1.16 | 4.90E-02 | WD repeat domain, phosphoinositide interacting 2                                                    |
| 5092   | PCBD1    | 1.16 | 2.95E-02 | pterin-4 alpha-carbinolamine dehydratase/dimerization cofactor of hepatocyte nuclear factor 1 alpha |
| 5203   | PFDN4    | 1.16 | 4.65E-02 | prefoldin subunit 4                                                                                 |
| 51181  | DCXR     | 1.16 | 4.12E-02 | dicarbonyl-L-xylulose reductase                                                                     |
| 571    | BACH1    | 1.16 | 4.56E-02 | BTB and CNC homology 1, basic leucine zipper transcription factor 1                                 |
| 3312   | HSPA8    | 1.16 | 9.45E-03 | heat shock 70kDa protein 8                                                                          |
| 4799   | NFX1     | 1.16 | 3.95E-02 | nuclear transcription factor, X-box binding 1                                                       |
| 79691  | QTRTD1   | 1.16 | 4.75E-02 | queuine tRNA-ribosyltransferase domain containing 1                                                 |
| 3376   | IARS     | 1.16 | 2.42E-02 | isoleucyl-tRNA synthetase                                                                           |
| 3313   | HSPA9    | 1.16 | 1.31E-02 | heat shock 70kDa protein 9 (mortalin)                                                               |
| 6856   | SYPL1    | 1.16 | 3.57E-02 | synaptophysin-like 1                                                                                |
| 27339  | PRPF19   | 1.15 | 4.77E-02 | pre-mRNA processing factor 19                                                                       |
| 8615   | USO1     | 1.15 | 2.81E-02 | USO1 vesicle transport factor                                                                       |
| 221749 | PXDC1    | 1.15 | 3.71E-02 | PX domain containing 1                                                                              |
| 5264   | PHYH     | 1.15 | 3.01E-02 | phytanoyl-CoA 2-hydroxylase                                                                         |
| 1650   | DDOST    | 1.15 | 4.85E-02 | dolichyl-diphosphooligosaccharide-protein glycosyltransferase subunit (non-catalytic)               |
| 1212   | CLTB     | 1.15 | 3.72E-02 | clathrin, light chain B                                                                             |
| 10969  | EBNA1BP2 | 1.15 | 2.73E-02 | EBNA1 binding protein 2                                                                             |
| 10857  | PGRMC1   | 1.15 | 6.31E-03 | progesterone receptor membrane component 1                                                          |
| 8833   | GMPS     | 1.15 | 4.25E-02 | guanine monophosphate synthase                                                                      |
| 8454   | CUL1     | 1.15 | 1.03E-02 | cullin 1                                                                                            |
| 60481  | ELOVL5   | 1.15 | 1.40E-02 | ELOVL fatty acid elongase 5                                                                         |
| 201627 | DENN6A   | 1.14 | 3.19E-02 | DENN/MADD domain containing 6A                                                                      |
| 7415   | VCP      | 1.14 | 4.53E-03 | valosin containing protein                                                                          |
| 23214  | XPO6     | 1.14 | 2.63E-02 | exportin 6                                                                                          |
| 7763   | ZFAND5   | 1.14 | 1.48E-02 | zinc finger, AN1-type domain 5                                                                      |
| 7358   | UGDH     | 1.14 | 8.38E-03 | UDP-glucose 6-dehydrogenase                                                                         |
| 5007   | OSBP     | 1.14 | 4.78E-02 | oxysterol binding protein                                                                           |
| 3069   | HDLBP    | 1.14 | 4.45E-02 | high density lipoprotein binding protein                                                            |

|       |           |      |          |                                                              |
|-------|-----------|------|----------|--------------------------------------------------------------|
| 23074 | UHRF1BP1L | 1.14 | 3.84E-02 | UHRF1 binding protein 1-like                                 |
| 3326  | HSP90AB1  | 1.14 | 1.56E-02 | heat shock protein 90kDa alpha (cytosolic), class B member 1 |
| 92856 | IMP4      | 1.14 | 1.33E-02 | IMP4, U3 small nucleolar ribonucleoprotein                   |
| 55970 | GNG12     | 1.13 | 2.98E-02 | guanine nucleotide binding protein (G protein), gamma 12     |
| 9275  | BCL7B     | 1.13 | 3.34E-02 | B-cell CLL/lymphoma 7B                                       |
| 4259  | MGST3     | 1.13 | 4.79E-02 | microsomal glutathione S-transferase 3                       |
| 1635  | DCTD      | 1.13 | 3.73E-02 | dCMP deaminase                                               |
| 3416  | IDE       | 1.13 | 3.17E-02 | insulin-degrading enzyme                                     |
| 94056 | SYAP1     | 1.13 | 2.35E-02 | synapse associated protein 1                                 |
| 821   | CANX      | 1.12 | 2.87E-02 | calnexin                                                     |
| 3267  | AGFG1     | 1.12 | 3.58E-02 | ArfGAP with FG repeats 1                                     |
| 5052  | PRDX1     | 1.11 | 4.10E-02 | peroxiredoxin 1                                              |
