# Supplementary material for: The impact of PPARα activation on whole genome gene expression in human precision cut liver slices
Source: PubMed Central journal article supplement (PMC4599789; doi:10.1186/s12864-015-1969-3), 2015-10-08
Supplement: 12864_2015_1969_MOESM2_ESM.pdf [file 12864_2015_1969_MOESM2_ESM.pdf]

| Entrez ID | gene name | fold change | q-value  | description                                                                        |
|-----------|-----------|-------------|----------|------------------------------------------------------------------------------------|
| 4283      | CXCL9     | -7.25       | 5.28E-05 | chemokine (C-X-C motif) ligand 9                                                   |
| 3627      | CXCL10    | -6.88       | 6.58E-05 | chemokine (C-X-C motif) ligand 10                                                  |
| 6373      | CXCL11    | -5.65       | 3.69E-04 | chemokine (C-X-C motif) ligand 11                                                  |
| 405753    | DUOXA2    | -3.97       | 3.05E-06 | dual oxidase maturation factor 2                                                   |
| 4843      | NOS2      | -3.62       | 5.43E-03 | nitric oxide synthase 2, inducible                                                 |
| 50506     | DUOX2     | -3.24       | 5.01E-06 | dual oxidase 2                                                                     |
| 6355      | CCL8      | -3.07       | 3.67E-03 | chemokine (C-C motif) ligand 8                                                     |
| 10964     | IFI44L    | -3.06       | 4.43E-04 | interferon-induced protein 44-like                                                 |
| 115362    | GBP5      | -2.94       | 6.83E-04 | guanylate binding protein 5                                                        |
| 3620      | IDO1      | -2.91       | 5.65E-06 | indoleamine 2,3-dioxygenase 1                                                      |
| 8519      | IFITM1    | -2.67       | 5.65E-06 | interferon induced transmembrane protein 1                                         |
| 3433      | IFIT2     | -2.61       | 2.28E-03 | interferon-induced protein with tetratricopeptide repeats 2                        |
| 54898     | ELOVL2    | -2.61       | 4.38E-07 | ELOVL fatty acid elongase 2                                                        |
| 2892      | GRIA3     | -2.60       | 3.06E-05 | glutamate receptor, ionotropic, AMPA 3                                             |
| 6376      | CX3CL1    | -2.57       | 4.43E-04 | chemokine (C-X3-C motif) ligand 1                                                  |
| 7098      | TLR3      | -2.55       | 5.76E-06 | toll-like receptor 3                                                               |
| 79689     | STEAP4    | -2.50       | 8.35E-05 | STEAP family member 4                                                              |
| 3434      | IFIT1     | -2.48       | 2.64E-03 | interferon-induced protein with tetratricopeptide repeats 1                        |
| 4321      | MMP12     | -2.45       | 2.30E-04 | matrix metalloproteinase 12 (macrophage elastase)                                  |
| 10826     | FAXD2     | -2.42       | 5.01E-06 | fatty acid hydroxylase domain containing 2                                         |
| 8626      | TP63      | -2.41       | 2.02E-05 | tumor protein p63                                                                  |
| 64577     | ALDH8A1   | -2.41       | 6.05E-06 | aldehyde dehydrogenase 8 family, member A1                                         |
| 8740      | TNFSF14   | -2.40       | 6.35E-05 | tumor necrosis factor (ligand) superfamily, member 14                              |
| 10417     | SPON2     | -2.39       | 2.46E-06 | spondin 2, extracellular matrix protein                                            |
| 3437      | IFIT3     | -2.38       | 2.74E-04 | interferon-induced protein with tetratricopeptide repeats 3                        |
| 54739     | XAF1      | -2.35       | 3.46E-06 | XIAP associated factor 1                                                           |
| 94240     | EPST11    | -2.29       | 2.79E-04 | epithelial stromal interaction 1 (breast)                                          |
| 10346     | TRIM22    | -2.28       | 4.50E-06 | tripartite motif containing 22                                                     |
| 83953     | FCAMR     | -2.28       | 1.16E-02 | Fc receptor, IgA, IgM, high affinity                                               |
| 3934      | LCN2      | -2.26       | 1.95E-04 | lipocalin 2                                                                        |
| 388646    | GBP7      | -2.25       | 1.82E-04 | guanylate binding protein 7                                                        |
| 57817     | HAMP      | -2.24       | 5.28E-05 | hepcidin antimicrobial peptide                                                     |
| 2634      | GBP2      | -2.22       | 6.65E-05 | guanylate binding protein 2, interferon-inducible                                  |
| 9288      | TAAR3     | -2.22       | 2.65E-02 | trace amine associated receptor 3 (gene/pseudogene)                                |
| 115361    | GBP4      | -2.21       | 2.38E-04 | guanylate binding protein 4                                                        |
| 6372      | CXCL6     | -2.20       | 8.74E-04 | chemokine (C-X-C motif) ligand 6                                                   |
| 10537     | UBD       | -2.19       | 1.02E-06 | ubiquitin D                                                                        |
| 11274     | USP18     | -2.18       | 3.82E-04 | ubiquitin specific peptidase 18                                                    |
| 51156     | SERPINA10 | -2.18       | 2.15E-05 | serpin peptidase inhibitor, clade A (alpha-1 antitrypsin, antitrypsin), member 10  |
| 6999      | TDO2      | -2.16       | 9.97E-03 | tryptophan 2,3-dioxygenase                                                         |
| 256764    | WDR72     | -2.15       | 1.02E-03 | WD repeat domain 72                                                                |
| 5920      | RARRES3   | -2.12       | 1.34E-06 | retinoic acid receptor responder (tazarotene induced) 3                            |
| 5284      | PIGR      | -2.11       | 1.97E-03 | polymeric immunoglobulin receptor                                                  |
| 4939      | OAS2      | -2.10       | 5.36E-04 | 2'-5'-oligoadenylate synthetase 2, 69/71kDa                                        |
| 113146    | AHNAK2    | -2.09       | 6.05E-06 | AHNAK nucleoprotein 2                                                              |
| 4599      | MX1       | -2.07       | 5.70E-04 | myxovirus (influenza virus) resistance 1, interferon-inducible protein p78 (mouse) |
| 4940      | OAS3      | -2.06       | 4.49E-04 | 2'-5'-oligoadenylate synthetase 3, 100kDa                                          |
| 57507     | ZNF608    | -2.06       | 5.01E-06 | zinc finger protein 608                                                            |
| 2633      | GBP1      | -2.04       | 1.05E-04 | guanylate binding protein 1, interferon-inducible                                  |
| 3626      | INHBC     | -2.03       | 9.40E-05 | inhibin, beta C                                                                    |
| 117153    | MIA2      | -2.02       | 2.07E-04 | melanoma inhibitory activity 2                                                     |
| 80833     | APOL3     | -2.01       | 1.86E-04 | apolipoprotein L, 3                                                                |
| 10068     | IL18BP    | -1.97       | 4.50E-06 | interleukin 18 binding protein                                                     |
| 54809     | SAMD9     | -1.97       | 2.61E-05 | sterile alpha motif domain containing 9                                            |
| 84873     | GPR128    | -1.97       | 4.02E-05 | G protein-coupled receptor 128                                                     |
| 5168      | ENPP2     | -1.97       | 4.50E-06 | ectonucleotide pyrophosphatase/phosphodiesterase 2                                 |
| 5207      | PFKFB1    | -1.96       | 3.69E-04 | 6-phosphofructo-2-kinase/fructose-2,6-bisphosphatase 1                             |
| 10272     | FSTL3     | -1.96       | 6.80E-03 | folistatin-like 3 (secreted glycoprotein)                                          |
| 6289      | SAA2      | -1.96       | 1.46E-03 | serum amyloid A2                                                                   |
| 10561     | IFI44     | -1.95       | 2.40E-04 | interferon-induced protein 44                                                      |
| 420       | ART4      | -1.94       | 1.30E-04 | ADP-ribosyltransferase 4 (Dombrock blood group)                                    |
| 219285    | SAMD9L    | -1.94       | 7.48E-04 | sterile alpha motif domain containing 9-like                                       |
| 4938      | OAS1      | -1.94       | 1.86E-04 | 2'-5'-oligoadenylate synthetase 1, 40/46kDa                                        |
| 80380     | PDCD1LG2  | -1.93       | 1.30E-03 | programmed cell death 1 ligand 2                                                   |
| 23586     | DDX58     | -1.93       | 8.22E-05 | DEAD (Asp-Glu-Ala-Asp) box polypeptide 58                                          |
| 9636      | ISG15     | -1.92       | 8.26E-04 | ISG15 ubiquitin-like modifier                                                      |
| 4547      | MTTP      | -1.91       | 1.65E-04 | microsomal triglyceride transfer protein                                           |
| 343450    | KCNT2     | -1.90       | 6.93E-05 | potassium channel, subfamily T, member 2                                           |
| 5288      | PIK3C2G   | -1.90       | 2.58E-04 | phosphatidylinositol-4-phosphate 3-kinase, catalytic subunit type 2 gamma          |
| 2537      | IFI6      | -1.89       | 1.29E-05 | interferon, alpha-inducible protein 6                                              |
| 1592      | CYP26A1   | -1.89       | 7.57E-04 | cytochrome P450, family 26, subfamily A, polypeptide 1                             |
| 342372    | PKD1L3    | -1.89       | 2.15E-03 | polycystic kidney disease 1-like 3                                                 |
| 353514    | LILRA5    | -1.87       | 1.46E-03 | leukocyte immunoglobulin-like receptor, subfamily A (with TM domain), member 5     |
| 7042      | TGFB2     | -1.87       | 2.30E-06 | transforming growth factor, beta 2                                                 |
| 23767     | FLRT3     | -1.86       | 2.25E-04 | fibronectin leucine rich transmembrane protein 3                                   |
| 83666     | PARP9     | -1.86       | 3.18E-05 | poly (ADP-ribose) polymerase family, member 9                                      |
| 412       | STS       | -1.85       | 4.62E-04 | steroid sulfatase (microsomal), isozyme S                                          |
| 10677     | AVIL      | -1.84       | 4.43E-04 | advillin                                                                           |
| 83729     | INHBE     | -1.84       | 6.47E-04 | inhibin, beta E                                                                    |
| 163351    | GBP6      | -1.82       | 1.65E-02 | guanylate binding protein family, member 6                                         |
| 2635      | GBP3      | -1.82       | 3.43E-04 | guanylate binding protein 3                                                        |
| 55008     | HERC6     | -1.81       | 3.76E-03 | HECT and RLD domain containing E3 ubiquitin protein ligase family member 6         |
| 6274      | S100A3    | -1.81       | 4.79E-02 | S100 calcium binding protein A3                                                    |
| 55601     | DDX60     | -1.81       | 3.68E-04 | DEAD (Asp-Glu-Ala-Asp) box polypeptide 60                                          |
| 114899    | C1QTNF3   | -1.80       | 2.75E-02 | C1q and tumor necrosis factor related protein 3                                    |
| 27289     | RND1      | -1.79       | 1.56E-04 | Rho family GTPase 1                                                                |
| 952       | CD38      | -1.78       | 6.84E-04 | CD38 molecule                                                                      |

|           |           |       |          |                                                                                                      |
|-----------|-----------|-------|----------|------------------------------------------------------------------------------------------------------|
| 9510      | ADAMTS1   | -1.78 | 2.41E-02 | ADAM metalloproteinase with thrombospondin type 1 motif, 1                                           |
| 5737      | PTGFR     | -1.78 | 7.03E-04 | prostaglandin F receptor (FP)                                                                        |
| 51056     | LAP3      | -1.78 | 1.46E-03 | leucine aminopeptidase 3                                                                             |
| 64108     | RTP4      | -1.77 | 1.33E-03 | receptor (chemosensory) transporter protein 4                                                        |
| 6363      | CCL19     | -1.77 | 5.33E-05 | chemokine (C-C motif) ligand 19                                                                      |
| 4068      | SH2D1A    | -1.77 | 1.20E-02 | SH2 domain containing 1A                                                                             |
| 7127      | TNFAIP2   | -1.76 | 5.43E-03 | tumor necrosis factor, alpha-induced protein 2                                                       |
| 28951     | TRIB2     | -1.75 | 1.94E-03 | tribbles pseudokinase 2                                                                              |
| 222643    | UNC5CL    | -1.75 | 1.02E-03 | unc-5 homolog C (C. elegans)-like                                                                    |
| 9076      | CLDN1     | -1.75 | 1.06E-06 | claudin 1                                                                                            |
| 6690      | SPINK1    | -1.74 | 3.81E-03 | serine peptidase inhibitor, Kazal type 1                                                             |
| 200373    | PCDP1     | -1.74 | 1.56E-03 | primary ciliary dyskinesia protein 1                                                                 |
| 6352      | CCL5      | -1.74 | 6.93E-04 | chemokine (C-C motif) ligand 5                                                                       |
| 8875      | VNN2      | -1.73 | 7.42E-04 | vanin 2                                                                                              |
| 11074     | TRIM31    | -1.73 | 6.09E-05 | tripartite motif containing 31                                                                       |
| 8743      | TNFSF10   | -1.73 | 1.99E-06 | tumor necrosis factor (ligand) superfamily, member 10                                                |
| 118932    | ANKRD22   | -1.73 | 8.29E-03 | ankyrin repeat domain 22                                                                             |
| 3430      | IFI35     | -1.72 | 5.43E-03 | interferon-induced protein 35                                                                        |
| 3560      | IL2RB     | -1.72 | 2.29E-03 | interleukin 2 receptor, beta                                                                         |
| 8470      | SORBS2    | -1.72 | 9.72E-04 | sorbin and SH3 domain containing 2                                                                   |
| 60489     | APOBEC3G  | -1.72 | 2.10E-02 | apolipoprotein B mRNA editing enzyme, catalytic polypeptide-like 3G                                  |
| 5698      | PSMB9     | -1.72 | 1.20E-03 | proteasome (prosome, macropain) subunit, beta type, 9                                                |
| 7045      | TGFB1     | -1.71 | 1.04E-04 | transforming growth factor, beta-induced, 68kDa                                                      |
| 2877      | GPX2      | -1.71 | 8.74E-03 | glutathione peroxidase 2 (gastrointestinal)                                                          |
| 51513     | ETV7      | -1.71 | 1.86E-02 | ets variant 7                                                                                        |
| 284111    | SLC13A5   | -1.71 | 4.83E-04 | solute carrier family 13 (sodium-dependent citrate transporter), member 5                            |
| 6288      | SAA1      | -1.71 | 3.91E-04 | serum amyloid A1                                                                                     |
| 5320      | PLA2G2A   | -1.70 | 1.06E-03 | phospholipase A2, group IIA (platelets, synovial fluid)                                              |
| 4212      | MEIS2     | -1.70 | 2.58E-04 | Meis homeobox 2                                                                                      |
| 64127     | NOD2      | -1.70 | 2.34E-02 | nucleotide-binding oligomerization domain containing 2                                               |
| 6906      | SERPINA7  | -1.69 | 1.77E-03 | serpin peptidase inhibitor, clade A (alpha-1 antitrypsin), member 7                                  |
| 64902     | AGXT2     | -1.69 | 1.93E-02 | alanine-glyoxylate aminotransferase 2                                                                |
| 6362      | CCL18     | -1.69 | 7.01E-04 | chemokine (C-C motif) ligand 18 (pulmonary and activation-regulated)                                 |
| 56521     | DNAJC12   | -1.69 | 2.28E-03 | DnaJ (Hsp40) homolog, subfamily C, member 12                                                         |
| 100423062 | IGLL5     | -1.69 | 4.02E-02 | immunoglobulin lambda-like polypeptide 5                                                             |
| 7274      | TTPA      | -1.68 | 1.32E-02 | tocopherol (alpha) transfer protein                                                                  |
| 29760     | BLNK      | -1.68 | 2.88E-03 | B-cell linker                                                                                        |
| 6335      | SCN9A     | -1.68 | 2.84E-03 | sodium channel, voltage-gated, type IX, alpha subunit                                                |
| 126410    | CYP4F22   | -1.68 | 2.94E-03 | cytochrome P450, family 4, subfamily F, polypeptide 22                                               |
| 126       | ADH1C     | -1.67 | 3.50E-02 | alcohol dehydrogenase 1C (class I), gamma polypeptide                                                |
| 10351     | ABCA8     | -1.67 | 1.30E-02 | ATP-binding cassette, sub-family A (ABC1), member 8                                                  |
| 3003      | GZMK      | -1.66 | 6.15E-03 | granzyme K (granzyme 3 // tryptase II)                                                               |
| 9971      | NR1H4     | -1.66 | 8.69E-05 | nuclear receptor subfamily 1, group H, member 4                                                      |
| 5629      | PROX1     | -1.66 | 3.84E-05 | prospero homeobox 1                                                                                  |
| 388403    | YPEL2     | -1.65 | 2.42E-04 | yippee-like 2 (Drosophila)                                                                           |
| 84072     | HORMAD1   | -1.65 | 4.16E-02 | HORMA domain containing 1                                                                            |
| 347051    | SLC10A5   | -1.65 | 8.97E-03 | solute carrier family 10, member 5                                                                   |
| 6318      | SERPINB4  | -1.63 | 2.98E-02 | serpin peptidase inhibitor, clade B (ovalbumin), member 4                                            |
| 5858      | PZP       | -1.63 | 2.91E-03 | pregnancy-zone protein                                                                               |
| 4982      | TNFRSF11B | -1.63 | 1.41E-03 | tumor necrosis factor receptor superfamily, member 11b                                               |
| 3429      | IFI27     | -1.62 | 1.42E-03 | interferon, alpha-inducible protein 27                                                               |
| 2621      | GAS6      | -1.62 | 1.94E-03 | growth arrest-specific 6                                                                             |
| 7447      | VSNL1     | -1.61 | 1.36E-03 | visinin-like 1                                                                                       |
| 834       | CASP1     | -1.61 | 2.46E-02 | caspase 1, apoptosis-related cysteine peptidase                                                      |
| 6366      | CCL21     | -1.60 | 1.76E-02 | chemokine (C-C motif) ligand 21                                                                      |
| 6775      | STAT4     | -1.60 | 2.49E-03 | signal transducer and activator of transcription 4                                                   |
| 84171     | LOXL4     | -1.60 | 3.32E-02 | lysyl oxidase-like 4                                                                                 |
| 2212      | FCGR2A    | -1.60 | 3.96E-03 | Fc fragment of IgG, low affinity IIA, receptor (CD32)                                                |
| 10158     | PDZK1IP1  | -1.60 | 2.84E-02 | PDZK1 interacting protein 1                                                                          |
| 4316      | MMP7      | -1.60 | 2.24E-02 | matrix metalloproteinase 7 (matrilysin, uterine)                                                     |
| 7097      | TLR2      | -1.59 | 2.26E-03 | toll-like receptor 2                                                                                 |
| 8736      | MYOM1     | -1.59 | 1.24E-02 | myomesin 1                                                                                           |
| 401474    | SAMD12    | -1.59 | 2.02E-02 | sterile alpha motif domain containing 12                                                             |
| 64135     | IFIH1     | -1.59 | 2.98E-03 | interferon induced with helicase C domain 1                                                          |
| 958       | CD40      | -1.59 | 1.20E-02 | CD40 molecule, TNF receptor superfamily member 5                                                     |
| 27074     | LAMP3     | -1.58 | 1.86E-04 | lysosomal-associated membrane protein 3                                                              |
| 10261     | IGSF6     | -1.58 | 2.81E-03 | immunoglobulin superfamily, member 6                                                                 |
| 6890      | TAP1      | -1.58 | 3.37E-03 | transporter 1, ATP-binding cassette, sub-family B (MDR/TAP)                                          |
| 1080      | CFTR      | -1.58 | 7.70E-04 | cystic fibrosis transmembrane conductance regulator (ATP-binding cassette sub-family C, member 7)    |
| 117247    | SLC16A10  | -1.57 | 1.05E-04 | solute carrier family 16 (aromatic amino acid transporter), member 10                                |
| 10906     | TRAFD1    | -1.57 | 8.33E-03 | TRAF-type zinc finger domain containing 1                                                            |
| 6716      | SRD5A2    | -1.57 | 2.74E-04 | steroid-5-alpha-reductase, alpha polypeptide 2 (3-oxo-5 alpha-steroid delta 4-dehydrogenase alpha 2) |
| 400986    | ANKRD36C  | -1.57 | 4.91E-04 | ankyrin repeat domain 36C                                                                            |
| 6696      | SPP1      | -1.57 | 1.41E-03 | secreted phosphoprotein 1                                                                            |
| 719       | C3AR1     | -1.57 | 4.19E-03 | complement component 3a receptor 1                                                                   |
| 10903     | MTMR11    | -1.56 | 2.31E-03 | myotubularin related protein 11                                                                      |
| 4739      | NEDD9     | -1.56 | 1.28E-03 | neural precursor cell expressed, developmentally down-regulated 9                                    |
| 30835     | CD209     | -1.56 | 5.51E-03 | CD209 molecule                                                                                       |
| 2267      | FGL1      | -1.56 | 2.06E-05 | fibrinogen-like 1                                                                                    |
| 3157      | HMGCS1    | -1.56 | 2.35E-05 | 3-hydroxy-3-methylglutaryl-CoA synthase 1 (soluble)                                                  |
| 389197    | C4orf50   | -1.56 | 6.25E-03 | chromosome 4 open reading frame 50                                                                   |
| 114836    | SLAMF6    | -1.56 | 3.72E-02 | SLAM family member 6                                                                                 |
| 3175      | ONECUT1   | -1.55 | 1.98E-03 | one cut homeobox 1                                                                                   |
| 2690      | GHR       | -1.55 | 3.72E-03 | growth hormone receptor                                                                              |
| 3659      | IRF1      | -1.55 | 6.31E-03 | interferon regulatory factor 1                                                                       |
| 7078      | TIMP3     | -1.55 | 9.19E-04 | TIMP metalloproteinase inhibitor 3                                                                   |
| 80310     | PDGFD     | -1.55 | 9.79E-03 | platelet derived growth factor D                                                                     |
| 5359      | PLSCR1    | -1.55 | 1.73E-04 | phospholipid scramblase 1                                                                            |

|           |              |       |          |                                                                              |
|-----------|--------------|-------|----------|------------------------------------------------------------------------------|
| 4837      | NNMT         | -1.55 | 2.35E-03 | nicotinamide N-methyltransferase                                             |
| 55013     | CCDC109B     | -1.55 | 1.04E-04 | coiled-coil domain containing 109B                                           |
| 55076     | TMEM45A      | -1.55 | 1.12E-02 | transmembrane protein 45A                                                    |
| 3383      | ICAM1        | -1.55 | 2.24E-03 | intercellular adhesion molecule 1                                            |
| 28755     | TRAC         | -1.55 | 1.75E-03 | T cell receptor alpha constant                                               |
| 9627      | SNCAIP       | -1.54 | 8.39E-03 | synuclein, alpha interacting protein                                         |
| 6772      | STAT1        | -1.54 | 1.28E-03 | signal transducer and activator of transcription 1, 91kDa                    |
| 994       | CDC25B       | -1.54 | 7.05E-04 | cell division cycle 25B                                                      |
| 3001      | GZMA         | -1.54 | 1.99E-02 | granzyme A (granzyme 1, cytotoxic T-lymphocyte-associated serine esterase 3) |
| 221468    | TMEM217      | -1.54 | 6.07E-03 | transmembrane protein 217                                                    |
| 117283    | IP6K3        | -1.54 | 1.18E-02 | inositol hexakisphosphate kinase 3                                           |
| 597       | BCL2A1       | -1.53 | 8.77E-03 | BCL2-related protein A1                                                      |
| 10568     | SLC34A2      | -1.53 | 4.17E-03 | solute carrier family 34 (type II sodium/phosphate cotransporter), member 2  |
| 57393     | TMEM27       | -1.53 | 1.51E-02 | transmembrane protein 27                                                     |
| 10866     | HCP5         | -1.53 | 3.84E-03 | HLA complex P5 (non-protein coding)                                          |
| 5721      | PSME2        | -1.53 | 1.29E-02 | proteasome (prosome, macropain) activator subunit 2 (PA28 beta)              |
| 8564      | KMO          | -1.53 | 2.47E-03 | kynurenine 3-monooxygenase (kynurenine 3-hydroxylase)                        |
| 7453      | WARS         | -1.52 | 6.26E-03 | tryptophanyl-tRNA synthetase                                                 |
| 5341      | PLEK         | -1.52 | 3.76E-03 | pleckstrin                                                                   |
| 55304     | SPTLC3       | -1.52 | 1.76E-03 | serine palmitoyltransferase, long chain base subunit 3                       |
| 2         | A2M          | -1.52 | 2.84E-02 | alpha-2-macroglobulin                                                        |
| 54625     | PARP14       | -1.52 | 6.41E-03 | poly (ADP-ribose) polymerase family, member 14                               |
| 338809    | C12orf74     | -1.51 | 1.54E-02 | chromosome 12 open reading frame 74                                          |
| 9563      | H6PD         | -1.50 | 1.86E-02 | hexose-6-phosphate dehydrogenase (glucose 1-dehydrogenase)                   |
| 727       | C5           | -1.50 | 1.29E-02 | complement component 5                                                       |
| 9332      | CD163        | -1.50 | 1.63E-02 | CD163 molecule                                                               |
| 5696      | PSMB8        | -1.50 | 1.10E-03 | proteasome (prosome, macropain) subunit, beta type, 8                        |
| 80323     | CCDC68       | -1.50 | 2.66E-02 | coiled-coil domain containing 68                                             |
| 6351      | CCL4         | -1.50 | 3.85E-02 | chemokine (C-C motif) ligand 4                                               |
| 145864    | HAPLN3       | -1.49 | 4.00E-02 | hyaluronan and proteoglycan link protein 3                                   |
| 54757     | FAM20A       | -1.49 | 1.00E-02 | family with sequence similarity 20, member A                                 |
| 3075      | CFH          | -1.49 | 1.61E-04 | complement factor H                                                          |
| 59269     | HIVEP3       | -1.49 | 2.14E-03 | human immunodeficiency virus type I enhancer binding protein 3               |
| 9830      | TRIM14       | -1.49 | 1.04E-04 | tripartite motif containing 14                                               |
| 84174     | SLA2         | -1.49 | 6.31E-03 | Src-like-adaptor 2                                                           |
| 338821    | SLCO1B7      | -1.49 | 3.54E-02 | solute carrier organic anion transporter family, member 1B7 (non-functional) |
| 39        | ACAT2        | -1.49 | 9.40E-05 | acetyl-CoA acetyltransferase 2                                               |
| 150864    | FAM117B      | -1.48 | 1.47E-03 | family with sequence similarity 117, member B                                |
| 1824      | DSC2         | -1.48 | 1.79E-04 | desmocollin 2                                                                |
| 64116     | SLC39A8      | -1.48 | 2.14E-03 | solute carrier family 39 (zinc transporter), member 8                        |
| 81788     | NUAK2        | -1.48 | 1.72E-02 | NUAK family, SNF1-like kinase, 2                                             |
| 4261      | CIITA        | -1.47 | 2.11E-02 | class II, major histocompatibility complex, transactivator                   |
| 3128      | HLA-DRB6     | -1.47 | 3.96E-02 | major histocompatibility complex, class II, DR beta 6 (pseudogene)           |
| 54463     | FAM134B      | -1.47 | 1.94E-03 | family with sequence similarity 134, member B                                |
| 50604     | IL20         | -1.47 | 4.13E-02 | interleukin 20                                                               |
| 116071    | BATF2        | -1.47 | 4.24E-02 | basic leucine zipper transcription factor, ATF-like 2                        |
| 8854      | ALDH1A2      | -1.47 | 2.03E-02 | aldehyde dehydrogenase 1 family, member A2                                   |
| 6446      | SGK1         | -1.47 | 2.21E-03 | serum/glucocorticoid regulated kinase 1                                      |
| 10384     | BTN3A3       | -1.47 | 6.77E-03 | butyrophilin, subfamily 3, member A3                                         |
| 127733    | UBXN10       | -1.47 | 1.09E-02 | UBX domain protein 10                                                        |
| 94241     | TP53INP1     | -1.47 | 1.10E-03 | tumor protein p53 inducible nuclear protein 1                                |
| 5699      | PSMB10       | -1.46 | 2.00E-03 | proteasome (prosome, macropain) subunit, beta type, 10                       |
| 25939     | SAMHD1       | -1.46 | 1.19E-02 | SAM domain and HD domain 1                                                   |
| 843       | CASP10       | -1.46 | 1.96E-02 | caspase 10, apoptosis-related cysteine peptidase                             |
| 129607    | CMPK2        | -1.46 | 2.91E-02 | cytidine monophosphate (UMP-CMP) kinase 2, mitochondrial                     |
| 10993     | SDS          | -1.46 | 2.10E-03 | serine dehydratase                                                           |
| 158584    | FAAH2        | -1.46 | 8.28E-03 | fatty acid amide hydrolase 2                                                 |
| 113263    | GLCC1        | -1.46 | 1.47E-03 | glucocorticoid induced transcript 1                                          |
| 1723      | DHODH        | -1.46 | 4.59E-02 | dihydroorotate dehydrogenase (quinone)                                       |
| 1806      | DPYD         | -1.46 | 2.10E-03 | dihydropyrimidine dehydrogenase                                              |
| 4494      | MT1F         | -1.46 | 1.86E-04 | metallothionein 1F                                                           |
| 158219    | TTC39B       | -1.46 | 6.77E-03 | tetratricopeptide repeat domain 39B                                          |
| 55603     | FAM46A       | -1.46 | 8.97E-03 | family with sequence similarity 46, member A                                 |
| 81794     | ADAMTS10     | -1.46 | 7.03E-04 | ADAM metalloproteinase with thrombospondin type 1 motif, 10                  |
| 28638     | TRBC2        | -1.46 | 2.60E-02 | T cell receptor beta constant 2                                              |
| 128439    | SNHG11       | -1.46 | 1.72E-02 | small nucleolar RNA host gene 11 (non-protein coding)                        |
| 51313     | FAM198B      | -1.46 | 4.69E-03 | family with sequence similarity 198, member B                                |
| 8600      | TNFSF11      | -1.46 | 2.18E-03 | tumor necrosis factor (ligand) superfamily, member 11                        |
| 10154     | PLXNC1       | -1.45 | 1.31E-02 | plexin C1                                                                    |
| 168537    | GIMAP7       | -1.45 | 4.60E-03 | GTPase, IMAP family member 7                                                 |
| 57674     | RNF213       | -1.45 | 2.89E-03 | ring finger protein 213                                                      |
| 10225     | CD96         | -1.45 | 5.43E-03 | CD96 molecule                                                                |
| 55075     | UACA         | -1.45 | 3.09E-03 | uveal autoantigen with coiled-coil domains and ankyrin repeats               |
| 2272      | FHIT         | -1.45 | 4.50E-02 | fragile histidine triad                                                      |
| 84419     | C15orf48     | -1.45 | 2.99E-02 | chromosome 15 open reading frame 48                                          |
| 10379     | IRF9         | -1.45 | 7.70E-04 | interferon regulatory factor 9                                               |
| 3431      | SP110        | -1.45 | 2.58E-03 | SP110 nuclear body protein                                                   |
| 100133315 | LOC100133315 | -1.44 | 2.60E-02 | transient receptor potential cation channel, subfamily C, member 2-like      |
| 406       | ARNTL        | -1.44 | 5.20E-03 | aryl hydrocarbon receptor nuclear translocator-like                          |
| 3005      | H1FO         | -1.44 | 7.10E-04 | H1 histone family, member 0                                                  |
| 337972    | KRTAP19-5    | -1.44 | 4.67E-02 | keratin associated protein 19-5                                              |
| 3728      | JUP          | -1.44 | 2.78E-04 | junction plakoglobin                                                         |
| 2160      | F11          | -1.44 | 6.75E-04 | coagulation factor XI                                                        |
| 23213     | SULF1        | -1.44 | 1.39E-02 | sulfatase 1                                                                  |
| 953       | ENTPD1       | -1.44 | 4.64E-03 | ectonucleoside triphosphate diphosphohydrolase 1                             |
| 6385      | SDC4         | -1.44 | 1.78E-03 | syndecan 4                                                                   |
| 1520      | CTSS         | -1.44 | 2.65E-03 | cathepsin S                                                                  |
| 259307    | IL4I1        | -1.44 | 8.20E-03 | interleukin 4 induced 1                                                      |

|        |          |       |          |                                                                                                                  |
|--------|----------|-------|----------|------------------------------------------------------------------------------------------------------------------|
| 3929   | LBP      | -1.44 | 1.77E-03 | lipopolysaccharide binding protein                                                                               |
| 440836 | ODF3B    | -1.44 | 3.11E-02 | outer dense fiber of sperm tails 3B                                                                              |
| 6590   | SLPI     | -1.43 | 2.71E-03 | secretory leukocyte peptidase inhibitor                                                                          |
| 6499   | SKIV2L   | -1.43 | 1.12E-02 | superkiller viralicidal activity 2-like (S. cerevisiae)                                                          |
| 199    | AIF1     | -1.43 | 1.64E-02 | allograft inflammatory factor 1                                                                                  |
| 4008   | LMO7     | -1.42 | 1.97E-03 | LIM domain 7                                                                                                     |
| 23460  | ABCA6    | -1.42 | 1.08E-02 | ATP-binding cassette, sub-family A (ABC1), member 6                                                              |
| 4318   | MMP9     | -1.42 | 6.31E-03 | matrix metalloproteinase 9 (gelatinase B, 92kDa gelatinase, 92kDa type IV collagenase)                           |
| 8832   | CD84     | -1.42 | 5.45E-03 | CD84 molecule                                                                                                    |
| 5031   | P2RY6    | -1.42 | 3.42E-02 | pyrimidinergic receptor P2Y, G-protein coupled, 6                                                                |
| 79132  | DHX58    | -1.42 | 3.43E-02 | DEXH (Asp-Glu-X-His) box polypeptide 58                                                                          |
| 8013   | NR4A3    | -1.42 | 4.19E-03 | nuclear receptor subfamily 4, group A, member 3                                                                  |
| 23012  | STK38L   | -1.42 | 4.42E-05 | serine/threonine kinase 38 like                                                                                  |
| 2766   | GMPR     | -1.42 | 4.93E-02 | guanosine monophosphate reductase                                                                                |
| 6892   | TAPBP    | -1.42 | 1.59E-04 | TAP binding protein (tapasin)                                                                                    |
| 25816  | TNFAIP8  | -1.42 | 8.39E-03 | tumor necrosis factor, alpha-induced protein 8                                                                   |
| 91351  | DDX60L   | -1.42 | 2.46E-02 | DEAD (Asp-Glu-Ala-Asp) box polypeptide 60-like                                                                   |
| 1643   | DDB2     | -1.42 | 2.30E-03 | damage-specific DNA binding protein 2, 48kDa                                                                     |
| 23780  | APOL2    | -1.42 | 4.60E-03 | apolipoprotein L, 2                                                                                              |
| 7412   | VCAM1    | -1.41 | 4.45E-02 | vascular cell adhesion molecule 1                                                                                |
| 3113   | HLA-DPA1 | -1.41 | 5.99E-03 | major histocompatibility complex, class II, DP alpha 1                                                           |
| 132321 | C4orf33  | -1.41 | 2.50E-02 | chromosome 4 open reading frame 33                                                                               |
| 51348  | KLRF1    | -1.41 | 1.38E-02 | killer cell lectin-like receptor subfamily F, member 1                                                           |
| 58476  | TP53INP2 | -1.41 | 6.07E-03 | tumor protein p53 inducible nuclear protein 2                                                                    |
| 976    | CD97     | -1.41 | 4.10E-02 | CD97 molecule                                                                                                    |
| 3176   | HNMT     | -1.41 | 6.89E-04 | histamine N-methyltransferase                                                                                    |
| 83875  | BCO2     | -1.41 | 2.47E-02 | beta-carotene oxygenase 2                                                                                        |
| 3140   | MR1      | -1.41 | 4.81E-03 | major histocompatibility complex, class I-related                                                                |
| 1236   | CCR7     | -1.41 | 4.59E-02 | chemokine (C-C motif) receptor 7                                                                                 |
| 166336 | PRICKLE2 | -1.40 | 3.02E-02 | prickle homolog 2 (Drosophila)                                                                                   |
| 56892  | C8orf4   | -1.40 | 1.14E-03 | chromosome 8 open reading frame 4                                                                                |
| 83593  | RASSF5   | -1.40 | 2.72E-02 | Ras association (RalGDS/AF-6) domain family member 5                                                             |
| 79668  | PARP8    | -1.40 | 4.01E-03 | poly (ADP-ribose) polymerase family, member 8                                                                    |
| 10410  | IFITM3   | -1.39 | 4.62E-04 | interferon induced transmembrane protein 3                                                                       |
| 9235   | IL32     | -1.39 | 1.01E-03 | interleukin 32                                                                                                   |
| 55064  | SPATA6L  | -1.39 | 1.86E-02 | spermatogenesis associated 6-like                                                                                |
| 6480   | ST6GAL1  | -1.39 | 6.72E-03 | ST6 beta-galactosamide alpha-2,6-sialyltransferase 1                                                             |
| 9746   | CLSTN3   | -1.39 | 1.04E-04 | calsyntenin 3                                                                                                    |
| 4343   | MOV10    | -1.39 | 1.30E-03 | Mov10, Moloney leukemia virus 10, homolog (mouse)                                                                |
| 255231 | MCOLN2   | -1.39 | 3.34E-02 | mucoilin 2                                                                                                       |
| 6695   | SPOCK1   | -1.39 | 8.47E-03 | sparc/osteonectin, cwcv and kaza-like domains proteoglycan (testican) 1                                          |
| 6718   | AKR1D1   | -1.39 | 2.41E-03 | aldo-keto reductase family 1, member D1                                                                          |
| 10100  | TSPAN2   | -1.38 | 3.56E-02 | tetraspanin 2                                                                                                    |
| 30817  | EMR2     | -1.38 | 9.46E-03 | egf-like module containing, mucin-like, hormone receptor-like 2                                                  |
| 3717   | JAK2     | -1.38 | 2.08E-02 | Janus kinase 2                                                                                                   |
| 79776  | ZFXH4    | -1.38 | 6.71E-03 | zinc finger homeobox 4                                                                                           |
| 348645 | C22orf34 | -1.38 | 4.61E-02 | chromosome 22 open reading frame 34                                                                              |
| 91937  | TIMD4    | -1.38 | 1.30E-02 | T-cell immunoglobulin and mucin domain containing 4                                                              |
| 1033   | CDKN3    | -1.38 | 4.83E-02 | cyclin-dependent kinase inhibitor 3                                                                              |
| 10863  | ADAM28   | -1.38 | 2.08E-02 | ADAM metalloproteinase domain 28                                                                                 |
| 93663  | ARHGAP18 | -1.38 | 4.55E-03 | Rho GTPase activating protein 18                                                                                 |
| 1073   | CFL2     | -1.38 | 7.21E-04 | cofilin 2 (muscle)                                                                                               |
| 64218  | SEMA4A   | -1.38 | 1.89E-03 | sema domain, immunoglobulin domain (Ig), transmembrane domain (TM) and short cytoplasmic domain, (semaphorin) 4A |
| 26031  | OSBPL3   | -1.38 | 1.69E-02 | oxysterol binding protein-like 3                                                                                 |
| 148213 | ZNF681   | -1.38 | 2.66E-02 | zinc finger protein 681                                                                                          |
| 26191  | PTN22    | -1.38 | 4.51E-02 | protein tyrosine phosphatase, non-receptor type 22 (lymphoid)                                                    |
| 140564 | APOBEC3D | -1.38 | 3.00E-02 | apolipoprotein B mRNA editing enzyme, catalytic polypeptide-like 3D                                              |
| 401494 | PTPLAD2  | -1.37 | 3.49E-02 | protein tyrosine phosphatase-like A domain containing 2                                                          |
| 6653   | SORL1    | -1.37 | 1.38E-02 | sortilin-related receptor, L (DLR class) A repeats containing                                                    |
| 7903   | ST8SIA4  | -1.37 | 1.62E-02 | ST8 alpha-N-acetyl-neuraminidase alpha-2,8-sialyltransferase 4                                                   |
| 55824  | PAG1     | -1.37 | 1.82E-02 | phosphoprotein associated with glycosphingolipid microdomains 1                                                  |
| 9246   | UBE2L6   | -1.37 | 1.62E-02 | ubiquitin-conjugating enzyme E2L 6                                                                               |
| 6347   | CCL2     | -1.37 | 1.39E-02 | chemokine (C-C motif) ligand 2                                                                                   |
| 145957 | NRG4     | -1.37 | 2.78E-02 | neuregulin 4                                                                                                     |
| 6891   | TAP2     | -1.37 | 4.26E-02 | transporter 2, ATP-binding cassette, sub-family B (MDR/TAP)                                                      |
| 3026   | HABP2    | -1.37 | 1.59E-03 | hyaluronan binding protein 2                                                                                     |
| 81704  | DOCK8    | -1.37 | 8.38E-03 | dedicator of cytokinesis 8                                                                                       |
| 9175   | MAP3K13  | -1.37 | 4.25E-02 | mitogen-activated protein kinase kinase kinase 13                                                                |
| 10457  | GPNUMB   | -1.37 | 3.71E-02 | glycoprotein (transmembrane) nmb                                                                                 |
| 79370  | BCL2L14  | -1.37 | 2.73E-02 | BCL2-like 14 (apoptosis facilitator)                                                                             |
| 4084   | MXD1     | -1.37 | 9.72E-04 | MAX dimerization protein 1                                                                                       |
| 3070   | HELLS    | -1.37 | 4.87E-02 | helicase, lymphoid-specific                                                                                      |
| 5880   | RAC2     | -1.37 | 9.40E-03 | ras-related C3 botulinum toxin substrate 2 (rho family, small GTP binding protein Rac2)                          |
| 5027   | P2RX7    | -1.37 | 8.81E-03 | purinergic receptor P2X, ligand-gated ion channel, 7                                                             |
| 857    | CAV1     | -1.36 | 1.64E-02 | caveolin 1, caveolae protein, 22kDa                                                                              |
| 10203  | CALCRL   | -1.36 | 1.77E-02 | calcitonin receptor-like                                                                                         |
| 2207   | FCER1G   | -1.36 | 9.73E-03 | Fc fragment of IgE, high affinity I, receptor for /// gamma polypeptide                                          |
| 8502   | PKP4     | -1.36 | 5.46E-04 | plakophilin 4                                                                                                    |
| 8836   | GGH      | -1.36 | 2.47E-02 | gamma-glutamyl hydrolase (conjugase, foly/polyglutamyglutamy hydrolase)                                          |
| 90527  | DUOXA1   | -1.36 | 7.43E-03 | dual oxidase maturation factor 1                                                                                 |
| 8673   | VAMP8    | -1.36 | 7.98E-05 | vesicle-associated membrane protein 8                                                                            |
| 3122   | HLA-DRA  | -1.36 | 3.73E-03 | major histocompatibility complex, class II, DR alpha                                                             |
| 123803 | NTAN1    | -1.36 | 4.53E-03 | N-terminal asparagine amidase                                                                                    |
| 94015  | TTYH2    | -1.36 | 2.56E-03 | tweety family member 2                                                                                           |
| 3604   | TNFRSF9  | -1.36 | 1.83E-02 | tumor necrosis factor receptor superfamily, member 9                                                             |
| 10288  | LILRB2   | -1.36 | 4.75E-02 | leukocyte immunoglobulin-like receptor, subfamily B (with TM and ITIM domains), member 2                         |
| 481    | ATP1B1   | -1.36 | 2.68E-03 | ATPase, Na <sup>+</sup> /K <sup>+</sup> transporting, beta 1 polypeptide                                         |
| 10581  | IFITM2   | -1.36 | 1.13E-02 | interferon induced transmembrane protein 2                                                                       |

|        |          |       |          |                                                                                                   |
|--------|----------|-------|----------|---------------------------------------------------------------------------------------------------|
| 23648  | SSBP3    | -1.36 | 1.11E-02 | single stranded DNA binding protein 3                                                             |
| 64092  | SAMSN1   | -1.35 | 5.45E-03 | SAM domain, SH3 domain and nuclear localization signals 1                                         |
| 342132 | ZNF774   | -1.35 | 4.35E-02 | zinc finger protein 774                                                                           |
| 57169  | ZNF1     | -1.35 | 8.82E-03 | zinc finger, NFX1-type containing 1                                                               |
| 4588   | MUC6     | -1.35 | 4.84E-02 | mucin 6, oligomeric mucus/gel-forming                                                             |
| 10133  | OPTN     | -1.35 | 1.06E-03 | optineurin                                                                                        |
| 55509  | BATF3    | -1.35 | 7.56E-03 | basic leucine zipper transcription factor, ATF-like 3                                             |
| 23768  | FLRT2    | -1.35 | 5.43E-03 | fibronectin leucine rich transmembrane protein 2                                                  |
| 961    | CD47     | -1.35 | 5.96E-03 | CD47 molecule                                                                                     |
| 1767   | DNAH5    | -1.35 | 3.89E-02 | dynein, axonemal, heavy chain 5                                                                   |
| 84166  | NLR5     | -1.35 | 3.43E-02 | NLR family, CARD domain containing 5                                                              |
| 241    | ALOX5AP  | -1.35 | 8.51E-03 | arachidonate 5-lipoxygenase-activating protein                                                    |
| 2627   | GATA6    | -1.35 | 1.44E-02 | GATA binding protein 6                                                                            |
| 50515  | CHST11   | -1.34 | 7.48E-04 | carbohydrate (chondroitin 4) sulfotransferase 11                                                  |
| 1519   | CTSO     | -1.34 | 1.64E-02 | cathepsin O                                                                                       |
| 669    | BPGM     | -1.34 | 1.06E-03 | 2,3-bisphosphoglycerate mutase                                                                    |
| 7111   | TMOD1    | -1.34 | 2.87E-02 | tropomodulin 1                                                                                    |
| 6367   | CCL22    | -1.34 | 1.96E-02 | chemokine (C-C motif) ligand 22                                                                   |
| 51704  | GPRC5B   | -1.34 | 1.34E-03 | G protein-coupled receptor, class C, group 5, member B                                            |
| 38     | ACAT1    | -1.34 | 1.27E-03 | acetyl-CoA acetyltransferase 1                                                                    |
| 725    | C4BPB    | -1.34 | 3.36E-02 | complement component 4 binding protein, beta                                                      |
| 972    | CD74     | -1.34 | 7.61E-03 | CD74 molecule, major histocompatibility complex, class II invariant chain                         |
| 89870  | TRIM15   | -1.34 | 3.61E-02 | tripartite motif containing 15                                                                    |
| 1004   | CDH6     | -1.34 | 9.60E-03 | cadherin 6, type 2, K-cadherin (fetal kidney)                                                     |
| 25903  | OLFML2B  | -1.34 | 4.67E-02 | olfactomedin-like 2B                                                                              |
| 9223   | MAG1     | -1.34 | 4.24E-03 | membrane associated guanylate kinase, WW and PDZ domain containing 1                              |
| 164656 | TMPRSS6  | -1.33 | 1.44E-03 | transmembrane protease, serine 6                                                                  |
| 85441  | HELZ2    | -1.33 | 2.85E-02 | helicase with zinc finger 2, transcriptional coactivator                                          |
| 7456   | WIPF1    | -1.33 | 2.23E-02 | WAS/WASL interacting protein family, member 1                                                     |
| 55619  | DOCK10   | -1.33 | 1.64E-02 | dedicator of cytokinesis 10                                                                       |
| 57530  | CGN      | -1.33 | 6.26E-03 | cingulin                                                                                          |
| 3108   | HLA-DMA  | -1.33 | 1.63E-02 | major histocompatibility complex, class II, DM alpha                                              |
| 57619  | SHROOM3  | -1.33 | 2.47E-02 | shroom family member 3                                                                            |
| 1880   | GPR183   | -1.33 | 1.17E-02 | G protein-coupled receptor 183                                                                    |
| 1890   | TYMP     | -1.33 | 6.65E-03 | thymidine phosphorylase                                                                           |
| 7743   | ZNF189   | -1.33 | 4.89E-03 | zinc finger protein 189                                                                           |
| 4300   | MLT3     | -1.33 | 3.98E-02 | myeloid/lymphoid or mixed-lineage leukemia (trithorax homolog, Drosophila) /// translocated to, 3 |
| 728411 | GUSBP1   | -1.33 | 6.77E-03 | glucuronidase, beta pseudogene 1                                                                  |
| 57655  | GRAMD1A  | -1.32 | 2.19E-02 | GRAM domain containing 1A                                                                         |
| 151636 | DTX3L    | -1.32 | 6.37E-03 | deltex 3 like, E3 ubiquitin ligase                                                                |
| 3937   | LCP2     | -1.32 | 1.93E-02 | lymphocyte cytosolic protein 2 (SH2 domain containing leukocyte protein of 76kDa)                 |
| 11199  | ANXA10   | -1.32 | 2.97E-02 | annexin A10                                                                                       |
| 5734   | PTGER4   | -1.32 | 1.75E-02 | prostaglandin E receptor 4 (subtype EP4)                                                          |
| 920    | CD4      | -1.32 | 2.47E-02 | CD4 molecule                                                                                      |
| 64393  | ZMAT3    | -1.32 | 1.59E-03 | zinc finger, matrin-type 3                                                                        |
| 80765  | STAR5    | -1.32 | 4.37E-02 | STAR-related lipid transfer (START) domain containing 5                                           |
| 23338  | JADE2    | -1.32 | 3.53E-02 | jade family PHD finger 2                                                                          |
| 717    | C2       | -1.32 | 5.70E-04 | complement component 2                                                                            |
| 694    | BTG1     | -1.32 | 1.52E-04 | B-cell translocation gene 1, anti-proliferative                                                   |
| 5552   | SRGN     | -1.32 | 1.46E-03 | serglycin                                                                                         |
| 64167  | ERAP2    | -1.32 | 3.83E-02 | endoplasmic reticulum aminopeptidase 2                                                            |
| 7104   | TMS6F4   | -1.32 | 3.42E-02 | transmembrane 4 L six family member 4                                                             |
| 8869   | ST3GAL5  | -1.32 | 4.11E-02 | ST3 beta-galactoside alpha-2,3-sialyltransferase 5                                                |
| 18     | ABAT     | -1.32 | 1.29E-02 | 4-aminobutyrate aminotransferase                                                                  |
| 11067  | C10orf10 | -1.31 | 1.35E-03 | chromosome 10 open reading frame 10                                                               |
| 359845 | FAM101B  | -1.31 | 6.38E-03 | family with sequence similarity 101, member B                                                     |
| 1030   | CDKN2B   | -1.31 | 8.76E-03 | cyclin-dependent kinase inhibitor 2B (p15, inhibits CDK4)                                         |
| 5294   | PIK3CG   | -1.31 | 3.94E-02 | phosphatidylinositol-4,5-bisphosphate 3-kinase, catalytic subunit gamma                           |
| 133308 | SLC9B2   | -1.31 | 2.05E-03 | solute carrier family 9, subfamily B (NHA2, cation proton antiporter 2), member 2                 |
| 51312  | SLC25A37 | -1.31 | 9.47E-03 | solute carrier family 25 (mitochondrial iron transporter), member 37                              |
| 5918   | RARRES1  | -1.31 | 2.04E-02 | retinoic acid receptor responder (tazarotene induced) 1                                           |
| 126917 | IFFO2    | -1.31 | 2.58E-02 | intermediate filament family orphan 2                                                             |
| 135112 | NCOA7    | -1.31 | 7.35E-03 | nuclear receptor coactivator 7                                                                    |
| 9873   | FCHSD2   | -1.31 | 5.67E-03 | FCH and double SH3 domains 2                                                                      |
| 64856  | VWA1     | -1.31 | 3.68E-02 | von Willebrand factor A domain containing 1                                                       |
| 5788   | PTPRC    | -1.31 | 4.67E-02 | protein tyrosine phosphatase, receptor type, C                                                    |
| 1356   | CP       | -1.31 | 5.03E-03 | ceruloplasmin (ferroxidase)                                                                       |
| 4524   | MTFHR    | -1.31 | 1.86E-02 | methylenetetrahydrofolate reductase (NAD(P)H)                                                     |
| 6609   | SMPD1    | -1.30 | 1.40E-02 | sphingomyelin phosphodiesterase 1, acid lysosomal                                                 |
| 79895  | ATP8B4   | -1.30 | 5.00E-02 | ATPase, class I, type 8B, member 4                                                                |
| 2595   | GANC     | -1.30 | 2.92E-02 | glucosidase, alpha /// neutral C                                                                  |
| 51279  | C1RL     | -1.30 | 5.89E-03 | complement component 1, r subcomponent-like                                                       |
| 732    | C8B      | -1.30 | 4.99E-03 | complement component 8, beta polypeptide                                                          |
| 1500   | CTNND1   | -1.30 | 5.77E-03 | catenin (cadherin-associated protein), delta 1                                                    |
| 6567   | SLC16A2  | -1.30 | 1.86E-02 | solute carrier family 16, member 2 (thyroid hormone transporter)                                  |
| 57185  | NIPAL3   | -1.30 | 2.98E-02 | NIPA-like domain containing 3                                                                     |
| 2040   | STOM     | -1.30 | 3.61E-03 | stomatin                                                                                          |
| 6387   | CXCL12   | -1.30 | 1.30E-03 | chemokine (C-X-C motif) ligand 12                                                                 |
| 200316 | APOBEC3F | -1.30 | 1.49E-02 | apolipoprotein B mRNA editing enzyme, catalytic polypeptide-like 3F                               |
| 3115   | HLA-DPB1 | -1.30 | 3.01E-02 | major histocompatibility complex, class II, DP beta 1                                             |
| 118788 | PIK3AP1  | -1.29 | 2.62E-02 | phosphoinositide-3-kinase adaptor protein 1                                                       |
| 23094  | SIPA1L3  | -1.29 | 3.83E-03 | signal-induced proliferation-associated 1 like 3                                                  |
| 118429 | ANTXR2   | -1.29 | 6.39E-04 | anthrax toxin receptor 2                                                                          |
| 4430   | MYO1B    | -1.29 | 1.60E-03 | myosin IB                                                                                         |
| 63901  | FAM111A  | -1.29 | 2.75E-02 | family with sequence similarity 111, member A                                                     |
| 5796   | PTPRK    | -1.29 | 1.30E-03 | protein tyrosine phosphatase, receptor type, K                                                    |
| 5519   | PPP2R1B  | -1.29 | 1.27E-03 | protein phosphatase 2, regulatory subunit A, beta                                                 |
| 55902  | ACSS2    | -1.29 | 1.23E-02 | acyl-CoA synthetase short-chain family member 2                                                   |

|        |           |       |          |                                                                                                          |
|--------|-----------|-------|----------|----------------------------------------------------------------------------------------------------------|
| 53     | ACP2      | -1.29 | 5.23E-03 | acid phosphatase 2, lysosomal                                                                            |
| 9881   | TRANK1    | -1.29 | 2.08E-02 | tetratricopeptide repeat and ankyrin repeat containing 1                                                 |
| 27106  | ARRDC2    | -1.29 | 1.00E-02 | arrestin domain containing 2                                                                             |
| 2266   | FGG       | -1.28 | 6.80E-03 | fibrinogen gamma chain                                                                                   |
| 10039  | PARP3     | -1.28 | 1.30E-02 | poly (ADP-ribose) polymerase family, member 3                                                            |
| 23424  | TDRD7     | -1.28 | 3.10E-02 | tudor domain containing 7                                                                                |
| 9674   | KIAA0040  | -1.28 | 1.07E-02 | KIAA0040                                                                                                 |
| 10026  | PIGK      | -1.28 | 3.82E-02 | phosphatidylinositol glycan anchor biosynthesis, class K                                                 |
| 11221  | DUSP10    | -1.28 | 8.93E-03 | dual specificity phosphatase 10                                                                          |
| 822    | CAPG      | -1.28 | 2.50E-02 | capping protein (actin filament), gelsolin-like                                                          |
| 54557  | SGTB      | -1.28 | 4.05E-02 | small glutamine-rich tetratricopeptide repeat (TPR)-containing, beta                                     |
| 285830 | HLA-F-AS1 | -1.28 | 4.86E-02 | HLA-F antisense RNA 1                                                                                    |
| 2028   | ENPEP     | -1.28 | 3.11E-02 | glutamyl aminopeptidase (aminopeptidase A)                                                               |
| 23235  | SIK2      | -1.28 | 3.77E-02 | salt-inducible kinase 2                                                                                  |
| 1959   | EGR2      | -1.28 | 1.61E-02 | early growth response 2                                                                                  |
| 11151  | CORO1A    | -1.28 | 1.86E-02 | coronin, actin binding protein, 1A                                                                       |
| 55620  | STAP2     | -1.28 | 2.36E-02 | signal transducing adaptor family member 2                                                               |
| 5045   | FURIN     | -1.28 | 6.20E-03 | furin (paired basic amino acid cleaving enzyme)                                                          |
| 10437  | IFI30     | -1.28 | 4.21E-02 | interferon, gamma-inducible protein 30                                                                   |
| 726    | CAPN5     | -1.28 | 2.02E-02 | calpain 5                                                                                                |
| 3134   | HLA-F     | -1.28 | 3.22E-02 | major histocompatibility complex, class I, F                                                             |
| 9032   | TM4SF5    | -1.28 | 2.96E-02 | transmembrane 4 L six family member 5                                                                    |
| 23705  | CADM1     | -1.28 | 4.25E-03 | cell adhesion molecule 1                                                                                 |
| 54464  | XRN1      | -1.28 | 1.55E-02 | 5'-3' exoribonuclease 1                                                                                  |
| 5720   | PSME1     | -1.27 | 6.25E-03 | proteasome (prosome, macropain) activator subunit 1 (PA28 alpha)                                         |
| 3096   | HIVEP1    | -1.27 | 1.18E-03 | human immunodeficiency virus type I enhancer binding protein 1                                           |
| 5345   | SERPINF2  | -1.27 | 2.14E-02 | serpin peptidase inhibitor, clade F (alpha-2 antiplasmin, pigment epithelium derived factor), member 2   |
| 1512   | CTSH      | -1.27 | 2.57E-03 | cathepsin H                                                                                              |
| 1803   | DPP4      | -1.27 | 2.41E-02 | dipeptidyl-peptidase 4                                                                                   |
| 90139  | TSPAN18   | -1.27 | 3.62E-02 | tetraspanin 18                                                                                           |
| 6615   | SNAI1     | -1.27 | 4.10E-02 | snail family zinc finger 1                                                                               |
| 51542  | VPS54     | -1.27 | 3.68E-02 | vacuolar protein sorting 54 homolog (S. cerevisiae)                                                      |
| 5058   | PAK1      | -1.27 | 1.28E-02 | p21 protein (Cdc42/Rac)-activated kinase 1                                                               |
| 11161  | C14orf1   | -1.27 | 1.39E-02 | chromosome 14 open reading frame 1                                                                       |
| 5610   | EIF2AK2   | -1.27 | 1.93E-02 | eukaryotic translation initiation factor 2-alpha kinase 2                                                |
| 115825 | WDFY2     | -1.27 | 3.42E-03 | WD repeat and FYVE domain containing 2                                                                   |
| 5337   | PLD1      | -1.27 | 4.48E-02 | phospholipase D1, phosphatidylcholine-specific                                                           |
| 8542   | APOL1     | -1.27 | 3.17E-02 | apolipoprotein L, 1                                                                                      |
| 9926   | LPGAT1    | -1.27 | 2.96E-02 | lysophosphatidylglycerol acyltransferase 1                                                               |
| 11278  | KLF12     | -1.27 | 3.84E-02 | Kruppel-like factor 12                                                                                   |
| 374378 | GALNT18   | -1.27 | 3.42E-02 | UDP-N-acetyl-alpha-D-galactosamine:polypeptide N-acetylgalactosaminyltransferase 18                      |
| 23654  | PLXNB2    | -1.27 | 1.86E-04 | plexin B2                                                                                                |
| 56829  | ZC3HAV1   | -1.27 | 1.77E-03 | zinc finger CCCH-type, antiviral 1                                                                       |
| 6240   | RRM1      | -1.27 | 4.26E-02 | ribonucleotide reductase M1                                                                              |
| 5641   | LGMN      | -1.26 | 7.37E-03 | legumain                                                                                                 |
| 8148   | TAF15     | -1.26 | 7.03E-04 | TAF15 RNA polymerase II, TATA box binding protein (TBP)-associated factor, 68kDa                         |
| 84159  | ARID5B    | -1.26 | 2.67E-03 | AT rich interactive domain 5B (MRF1-like)                                                                |
| 3587   | IL10RA    | -1.26 | 2.51E-02 | interleukin 10 receptor, alpha                                                                           |
| 221895 | JAZF1     | -1.26 | 4.96E-02 | JAZF zinc finger 1                                                                                       |
| 124540 | MSI2      | -1.26 | 1.18E-02 | musashi RNA-binding protein 2                                                                            |
| 3683   | ITGAL     | -1.26 | 4.54E-02 | integrin, alpha L (antigen CD11A (p180), lymphocyte function-associated antigen 1 /// alpha polypeptide) |
| 2934   | GSN       | -1.26 | 1.71E-02 | gelsolin                                                                                                 |
| 8530   | CST7      | -1.26 | 3.33E-02 | cystatin F (leukocystatin)                                                                               |
| 6768   | ST14      | -1.26 | 2.41E-02 | suppression of tumorigenicity 14 (colon carcinoma)                                                       |
| 285440 | CYP4V2    | -1.26 | 1.17E-03 | cytochrome P450, family 4, subfamily V, polypeptide 2                                                    |
| 64780  | MICAL1    | -1.26 | 4.29E-02 | microtubule associated monoxygenase, calponin and LIM domain containing 1                                |
| 629    | CFB       | -1.26 | 6.18E-04 | complement factor B                                                                                      |
| 3732   | CD82      | -1.26 | 1.53E-02 | CD82 molecule                                                                                            |
| 9945   | GFPT2     | -1.26 | 4.62E-02 | glutamine-fructose-6-phosphate transaminase 2                                                            |
| 64761  | PARP12    | -1.26 | 6.07E-03 | poly (ADP-ribose) polymerase family, member 12                                                           |
| 6307   | MSMO1     | -1.26 | 3.17E-02 | methylsterol monoxygenase 1                                                                              |
| 85461  | TANC1     | -1.26 | 8.85E-03 | tetratricopeptide repeat, ankyrin repeat and coiled-coil containing 1                                    |
| 81553  | FAM49A    | -1.26 | 4.31E-02 | family with sequence similarity 49, member A                                                             |
| 407018 | MIR27A    | -1.26 | 3.53E-02 | microRNA 27a                                                                                             |
| 9414   | TJP2      | -1.26 | 1.15E-02 | tight junction protein 2                                                                                 |
| 3684   | ITGAM     | -1.26 | 1.83E-02 | integrin, alpha M (complement component 3 receptor 3 subunit)                                            |
| 10018  | BCL2L11   | -1.26 | 1.86E-02 | BCL2-like 11 (apoptosis facilitator)                                                                     |
| 5654   | HTRA1     | -1.26 | 1.83E-02 | HtrA serine peptidase 1                                                                                  |
| 2995   | GYPC      | -1.26 | 4.35E-03 | glycophorin C (Gerbich blood group)                                                                      |
| 718    | C3        | -1.26 | 1.59E-03 | complement component 3                                                                                   |
| 51474  | LIMA1     | -1.26 | 1.00E-02 | LIM domain and actin binding 1                                                                           |
| 51667  | NUB1      | -1.25 | 8.02E-03 | negative regulator of ubiquitin-like proteins 1                                                          |
| 2037   | EPB41L2   | -1.25 | 4.73E-02 | erythrocyte membrane protein band 4.1-like 2                                                             |
| 3507   | IGHM      | -1.25 | 3.73E-02 | immunoglobulin heavy constant mu                                                                         |
| 10982  | MAPRE2    | -1.25 | 2.70E-02 | microtubule-associated protein, RP/EB family, member 2                                                   |
| 716    | C1S       | -1.25 | 3.37E-03 | complement component 1, s subcomponent                                                                   |
| 84885  | ZDHHC12   | -1.25 | 2.65E-02 | zinc finger, DHHC-type containing 12                                                                     |
| 10157  | AASS      | -1.25 | 3.95E-02 | aminoadipate-semialdehyde synthase                                                                       |
| 10420  | TESK2     | -1.25 | 3.36E-02 | testis-specific kinase 2                                                                                 |
| 23136  | EPB41L3   | -1.25 | 2.40E-02 | erythrocyte membrane protein band 4.1-like 3                                                             |
| 4853   | NOTCH2    | -1.25 | 1.08E-02 | notch 2                                                                                                  |
| 80830  | APOL6     | -1.25 | 3.44E-02 | apolipoprotein L, 6                                                                                      |
| 51768  | TM7SF3    | -1.25 | 8.33E-03 | transmembrane 7 superfamily member 3                                                                     |
| 5993   | RFX5      | -1.25 | 4.03E-02 | regulatory factor X, 5 (influences HLA class II expression)                                              |
| 3426   | CFI       | -1.25 | 2.51E-02 | complement factor I                                                                                      |
| 868    | CBLB      | -1.25 | 2.22E-03 | Cbl proto-oncogene B, E3 ubiquitin protein ligase                                                        |
| 55281  | TMEM140   | -1.25 | 2.80E-02 | transmembrane protein 140                                                                                |
| 4067   | LYN       | -1.25 | 4.68E-03 | v-src-1 Yamaguchi sarcoma viral related oncogene homolog                                                 |

|        |           |       |          |                                                                                     |
|--------|-----------|-------|----------|-------------------------------------------------------------------------------------|
| 5538   | PPT1      | -1.25 | 2.81E-02 | palmitoyl-protein thioesterase 1                                                    |
| 4818   | NKG7      | -1.25 | 4.68E-02 | natural killer cell granule protein 7                                               |
| 7277   | TUBA4A    | -1.24 | 2.91E-02 | tubulin, alpha 4a                                                                   |
| 55337  | C19orf66  | -1.24 | 1.36E-02 | chromosome 19 open reading frame 66                                                 |
| 93349  | SP140L    | -1.24 | 4.37E-02 | SP140 nuclear body protein-like                                                     |
| 3371   | TNC       | -1.24 | 2.34E-02 | tenascin C                                                                          |
| 330    | BIRC3     | -1.24 | 3.31E-02 | baculoviral IAP repeat containing 3                                                 |
| 123036 | TC2N      | -1.24 | 3.98E-02 | tandem C2 domains, nuclear                                                          |
| 3601   | IL15RA    | -1.24 | 7.43E-03 | interleukin 15 receptor, alpha                                                      |
| 23253  | ANKRD12   | -1.24 | 4.68E-03 | ankyrin repeat domain 12                                                            |
| 2224   | FDPS      | -1.24 | 4.91E-02 | farnesyl diphosphate synthase                                                       |
| 134429 | STARD4    | -1.24 | 2.67E-03 | StAR-related lipid transfer (START) domain containing 4                             |
| 57381  | RHOJ      | -1.24 | 2.10E-02 | ras homolog family member J                                                         |
| 4891   | SLC11A2   | -1.24 | 9.74E-03 | solute carrier family 11 (proton-coupled divalent metal ion transporter), member 2  |
| 4647   | MYO7A     | -1.24 | 2.91E-02 | myosin VIIA                                                                         |
| 89796  | NAV1      | -1.24 | 1.03E-02 | neuron navigator 1                                                                  |
| 8728   | ADAM19    | -1.24 | 1.06E-02 | ADAM metalloproteinase domain 19                                                    |
| 23157  | 6-sep     | -1.24 | 1.54E-02 | septin 6                                                                            |
| 12     | SERPINA3  | -1.24 | 1.80E-02 | serpin peptidase inhibitor, clade A (alpha-1 antiproteinase, antitrypsin), member 3 |
| 84230  | LRRRC8C   | -1.23 | 9.60E-03 | leucine rich repeat containing 8 family, member C                                   |
| 4124   | MAN2A1    | -1.23 | 3.37E-03 | mannosidase, alpha, class 2A, member 1                                              |
| 10046  | MAMLD1    | -1.23 | 8.96E-03 | mastermind-like domain containing 1                                                 |
| 3588   | IL10RB    | -1.23 | 1.10E-02 | interleukin 10 receptor, beta                                                       |
| 3017   | HIST1H2BD | -1.23 | 2.26E-02 | histone cluster 1, H2bd                                                             |
| 260425 | MAGI3     | -1.23 | 1.77E-02 | membrane associated guanylate kinase, WW and PDZ domain containing 3                |
| 123096 | SLC25A29  | -1.23 | 3.85E-02 | solute carrier family 25 (mitochondrial carnitine/acylcarnitine carrier), member 29 |
| 23635  | SSBP2     | -1.23 | 2.26E-02 | single-stranded DNA binding protein 2                                               |
| 22920  | KIFAP3    | -1.23 | 1.16E-02 | kinesin-associated protein 3                                                        |
| 3398   | ID2       | -1.23 | 1.82E-02 | inhibitor of DNA binding 2, dominant negative helix-loop-helix protein              |
| 9766   | KIAA0247  | -1.23 | 2.65E-02 | KIAA0247                                                                            |
| 214    | ALCAM     | -1.23 | 2.19E-02 | activated leukocyte cell adhesion molecule                                          |
| 23406  | COTL1     | -1.23 | 4.73E-02 | coactosin-like F-actin binding protein 1                                            |
| 10957  | PNRC1     | -1.23 | 6.43E-03 | proline-rich nuclear receptor coactivator 1                                         |
| 8613   | PPAP2B    | -1.23 | 3.98E-02 | phosphatidic acid phosphatase type 2B                                               |
| 140606 | SELM      | -1.23 | 3.77E-03 | selenoprotein M                                                                     |
| 23033  | DOPEY1    | -1.23 | 3.17E-02 | dopey family member 1                                                               |
| 178    | AGL       | -1.23 | 3.00E-02 | amylo-alpha-1, 6-glucosidase, 4-alpha-glucanotransferase                            |
| 4704   | NDUFA9    | -1.23 | 3.61E-02 | NADH dehydrogenase (ubiquinone) 1 alpha subcomplex, 9, 39kDa                        |
| 27244  | SESN1     | -1.22 | 4.68E-02 | sestrin 1                                                                           |
| 7263   | TST       | -1.22 | 3.46E-02 | thiosulfate sulfurtransferase (rhodanese)                                           |
| 23293  | SMG6      | -1.22 | 3.47E-02 | SMG6 nonsense mediated mRNA decay factor                                            |
| 8844   | KSR1      | -1.22 | 1.41E-02 | kinase suppressor of ras 1                                                          |
| 2683   | B4GALT1   | -1.22 | 4.54E-02 | UDP-Gal:betaGlcNAc beta 1,4- galactosyltransferase, polypeptide 1                   |
| 659    | BMPR2     | -1.22 | 1.23E-02 | bone morphogenetic protein receptor, type II (serine/threonine kinase)              |
| 9021   | SOC3      | -1.22 | 2.80E-02 | suppressor of cytokine signaling 3                                                  |
| 11031  | RAB31     | -1.22 | 1.03E-02 | RAB31, member RAS oncogene family                                                   |
| 114569 | MAL2      | -1.22 | 6.25E-03 | mal, T-cell differentiation protein 2 (gene/pseudogene)                             |
| 5156   | PDGFRA    | -1.22 | 3.54E-02 | platelet-derived growth factor receptor, alpha polypeptide                          |
| 51170  | HSD17B11  | -1.22 | 3.96E-02 | hydroxysteroid (17-beta) dehydrogenase 11                                           |
| 29992  | PILRA     | -1.22 | 2.80E-02 | paired immunoglobulin-like type 2 receptor alpha                                    |
| 56927  | GPR108    | -1.22 | 4.31E-02 | G protein-coupled receptor 108                                                      |
| 79815  | NIPAL2    | -1.22 | 4.96E-02 | NIPA-like domain containing 2                                                       |
| 23604  | DAPK2     | -1.21 | 4.96E-02 | death-associated protein kinase 2                                                   |
| 80344  | DCAF11    | -1.21 | 1.86E-02 | DDB1 and CUL4 associated factor 11                                                  |
| 2647   | BLOC1S1   | -1.21 | 2.97E-02 | biogenesis of lysosomal organelles complex-1, subunit 1                             |
| 3428   | IFI16     | -1.21 | 4.83E-02 | interferon, gamma-inducible protein 16                                              |
| 55803  | ADAP2     | -1.21 | 3.48E-02 | ArfGAP with dual PH domains 2                                                       |
| 196527 | ANO6      | -1.21 | 6.48E-03 | anoctamin 6                                                                         |
| 307    | ANXA4     | -1.21 | 4.24E-02 | annexin A4                                                                          |
| 285513 | GPRIN3    | -1.21 | 3.34E-02 | GPRIN family member 3                                                               |
| 9770   | RASSF2    | -1.21 | 1.06E-02 | Ras association (RalGDS/AF-6) domain family member 2                                |
| 647135 | SRGAP2B   | -1.21 | 9.80E-03 | SLIT-ROBO Rho GTPase activating protein 2B                                          |
| 355    | FAS       | -1.21 | 2.11E-02 | Fas cell surface death receptor                                                     |
| 3087   | HHEX      | -1.21 | 1.57E-02 | hematopoietically expressed homeobox                                                |
| 91452  | ACBD5     | -1.21 | 2.80E-02 | acyl-CoA binding domain containing 5                                                |
| 55748  | CNDP2     | -1.21 | 3.73E-02 | CNDP dipeptidase 2 (metalloproteinase M20 family)                                   |
| 6672   | SP100     | -1.20 | 1.99E-02 | SP100 nuclear antigen                                                               |
| 11329  | STK38     | -1.20 | 1.79E-02 | serine/threonine kinase 38                                                          |
| 88455  | ANKRD13A  | -1.20 | 4.01E-03 | ankyrin repeat domain 13A                                                           |
| 4478   | MSN       | -1.20 | 7.81E-03 | moesin                                                                              |
| 2581   | GALC      | -1.20 | 4.37E-02 | galactosylceramidase                                                                |
| 80021  | TMEM62    | -1.20 | 4.23E-02 | transmembrane protein 62                                                            |
| 10769  | PLK2      | -1.20 | 1.32E-02 | polo-like kinase 2                                                                  |
| 79056  | PRRG4     | -1.20 | 2.81E-02 | proline rich Gla (G-carboxyglutamic acid) 4 (transmembrane)                         |
| 900    | CCNG1     | -1.20 | 2.47E-03 | cyclin G1                                                                           |
| 25937  | VWTR1     | -1.20 | 3.42E-02 | VW domain containing transcription regulator 1                                      |
| 9124   | PDLIM1    | -1.19 | 3.67E-02 | PDZ and LIM domain 1                                                                |
| 722    | C4BPA     | -1.19 | 9.29E-03 | complement component 4 binding protein, alpha                                       |
| 57186  | RALGAPA2  | -1.19 | 2.91E-02 | Ral GTPase activating protein, alpha subunit 2 (catalytic)                          |
| 7052   | TGM2      | -1.19 | 3.50E-02 | transglutaminase 2                                                                  |
| 23102  | TBC1D2B   | -1.19 | 4.98E-02 | TBC1 domain family, member 2B                                                       |
| 6709   | SPTAN1    | -1.19 | 1.15E-02 | spectrin, alpha, non-erythrocytic 1                                                 |
| 1730   | DIAPH2    | -1.19 | 2.42E-02 | diaphanous-related formin 2                                                         |
| 6282   | S100A11   | -1.19 | 3.86E-02 | S100 calcium binding protein A11                                                    |
| 6934   | TCF7L2    | -1.19 | 1.14E-02 | transcription factor 7-like 2 (T-cell specific, HMG-box)                            |
| 23516  | SLC39A14  | -1.18 | 4.82E-02 | solute carrier family 39 (zinc transporter), member 14                              |
| 4646   | MYO6      | -1.18 | 1.55E-02 | myosin VI                                                                           |
| 223082 | ZNRF2     | -1.18 | 3.89E-02 | zinc and ring finger 2                                                              |

|        |         |       |          |                                                                                                   |
|--------|---------|-------|----------|---------------------------------------------------------------------------------------------------|
| 59338  | PLEKHA1 | -1.18 | 2.64E-02 | pleckstrin homology domain containing, family A (phosphoinositide binding specific) member 1      |
| 7538   | ZFP36   | -1.18 | 2.60E-02 | ZFP36 ring finger protein                                                                         |
| 23646  | PLD3    | -1.18 | 2.50E-02 | phospholipase D family, member 3                                                                  |
| 3065   | HDAC1   | -1.18 | 6.61E-03 | histone deacetylase 1                                                                             |
| 55014  | STX17   | -1.18 | 2.47E-02 | syntaxin 17                                                                                       |
| 6774   | STAT3   | -1.18 | 1.00E-02 | signal transducer and activator of transcription 3 (acute-phase response factor)                  |
| 9500   | MAGED1  | -1.18 | 3.11E-02 | melanoma antigen family D, 1                                                                      |
| 5446   | PON3    | -1.18 | 3.44E-02 | paraoxonase 3                                                                                     |
| 115548 | FCHO2   | -1.17 | 2.96E-02 | FCH domain only 2                                                                                 |
| 51088  | KLHL5   | -1.17 | 4.52E-02 | kelch-like family member 5                                                                        |
| 3985   | LIMK2   | -1.17 | 2.46E-02 | LIM domain kinase 2                                                                               |
| 25865  | PRKD2   | -1.17 | 2.58E-02 | protein kinase D2                                                                                 |
| 27436  | EML4    | -1.17 | 2.23E-02 | echinoderm microtubule associated protein like 4                                                  |
| 1021   | CDK6    | -1.17 | 4.10E-02 | cyclin-dependent kinase 6                                                                         |
| 808    | CALM3   | -1.17 | 4.03E-02 | calmodulin 3 (phosphorylase kinase, delta)                                                        |
| 3699   | ITIH3   | -1.17 | 2.03E-02 | inter-alpha-trypsin inhibitor heavy chain 3                                                       |
| 8892   | EIF2B2  | -1.17 | 1.37E-02 | eukaryotic translation initiation factor 2B, subunit 2 beta, 39kDa                                |
| 6558   | SLC12A2 | -1.17 | 4.60E-02 | solute carrier family 12 (sodium/potassium/chloride transporter), member 2                        |
| 6594   | SMARCA1 | -1.17 | 3.84E-02 | SWI/SNF related, matrix associated, actin dependent regulator of chromatin, subfamily a, member 1 |
| 3106   | HLA-B   | -1.17 | 3.84E-02 | major histocompatibility complex, class I, B                                                      |
| 800    | CALD1   | -1.17 | 2.52E-02 | caldesmon 1                                                                                       |
| 51571  | FAM49B  | -1.17 | 2.77E-02 | family with sequence similarity 49, member B                                                      |
| 731    | C8A     | -1.17 | 3.49E-02 | complement component 8, alpha polypeptide                                                         |
| 5562   | PRKAA1  | -1.17 | 2.65E-02 | protein kinase, AMP-activated, alpha 1 catalytic subunit                                          |
| 567    | B2M     | -1.17 | 4.48E-02 | beta-2-microglobulin                                                                              |
| 3611   | ILK     | -1.16 | 1.32E-02 | integrin-linked kinase                                                                            |
| 23530  | NNT     | -1.16 | 2.53E-02 | nicotinamide nucleotide transhydrogenase                                                          |
| 667    | DST     | -1.16 | 2.80E-02 | dystonin                                                                                          |
| 30844  | EHD4    | -1.16 | 2.98E-02 | EH-domain containing 4                                                                            |
| 11059  | WWP1    | -1.15 | 3.49E-02 | WW domain containing E3 ubiquitin protein ligase 1                                                |
| 48     | ACO1    | -1.15 | 4.78E-02 | aconitase 1, soluble                                                                              |
| 7317   | UBA1    | -1.15 | 2.60E-02 | ubiquitin-like modifier activating enzyme 1                                                       |
| 1282   | COL4A1  | -1.15 | 4.54E-02 | collagen, type IV, alpha 1                                                                        |
| 9879   | DDX46   | -1.15 | 4.03E-02 | DEAD (Asp-Glu-Ala-Asp) box polypeptide 46                                                         |
| 4670   | HNRNPM  | -1.15 | 2.10E-02 | heterogeneous nuclear ribonucleoprotein M                                                         |
| 23607  | CD2AP   | -1.15 | 2.74E-02 | CD2-associated protein                                                                            |
| 309    | ANXA6   | -1.15 | 3.69E-02 | annexin A6                                                                                        |
| 2244   | FGB     | -1.15 | 3.69E-02 | fibrinogen beta chain                                                                             |
| 1431   | CS      | -1.15 | 4.02E-02 | citrate synthase                                                                                  |
| 715    | C1R     | -1.14 | 2.63E-02 | complement component 1, r subcomponent                                                            |
| 3263   | HPX     | -1.14 | 1.62E-02 | hemopexin                                                                                         |
| 1389   | CREBL2  | -1.14 | 3.42E-02 | cAMP responsive element binding protein-like 2                                                    |
| 51585  | PCF11   | -1.14 | 4.89E-02 | PCF11 cleavage and polyadenylation factor subunit                                                 |
| 10096  | ACTR3   | -1.13 | 3.46E-02 | ARP3 actin-related protein 3 homolog (yeast)                                                      |
| 6314   | ATXN7   | -1.12 | 3.47E-02 | ataxin 7                                                                                          |
| 805    | CALM2   | -1.12 | 3.33E-02 | calmodulin 2 (phosphorylase kinase, delta)                                                        |
| 8553   | BHLHE40 | -1.12 | 4.29E-02 | basic helix-loop-helix family, member e40                                                         |
| 3315   | HSPB1   | -1.12 | 4.45E-02 | heat shock 27kDa protein 1                                                                        |
| 7533   | YWHAH   | -1.12 | 4.62E-02 | tyrosine 3-monooxygenase/tryptophan 5-monooxygenase activation protein, eta                       |
| 975    | CD81    | -1.12 | 2.43E-02 | CD81 molecule                                                                                     |
